# Supplementary material for: Physically mixed catalytic system of amino and sulfo-functional porous organic polymers as efficiently synergistic co-catalysts for one-pot cascade reactions
Source: Royal Society of Chemistry journal article supplement (doi:10.1039/d0nj01357a), 2020-01-01

**Physically Mixed Catalytic System of Amino and Sulfo-functional Porous Organic  
Polymers as Efficiently Synergistic Co-catalysts for One-pot Cascade Reactions**

Zunming Sun,<sup>a</sup> Fuyao Liu,<sup>a</sup> Xinyue Yang,<sup>a</sup> Xianpei Huang,<sup>a</sup> Mengmeng Zhang,<sup>a</sup>

Guomin Bian,<sup>b</sup> Yonglin Qi,<sup>b</sup> Xinlin Yang\*,<sup>a</sup> and Wangqing Zhang<sup>a</sup>

a) Key Laboratory of Functional Polymer Materials, Ministry of Education, Institute  
of Polymer Chemistry, College of Chemistry, Nankai University, Tianjin 300071,  
P. R. China

b) Dynea Ltd Co., Gaoyao City, Guangdong 526015, P. R. China

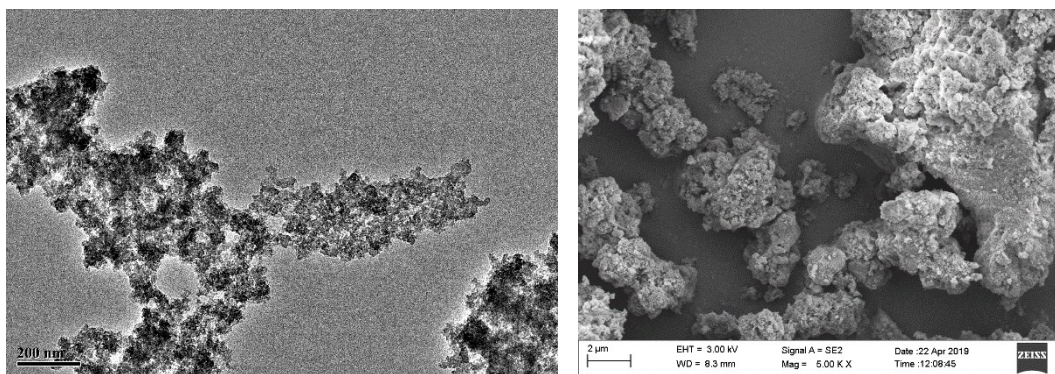

**Figure S1** TEM and SEM image of the recycled co-catalyst system P(DVB-0.2-VBS)/P(DVB-0.2-VBA)

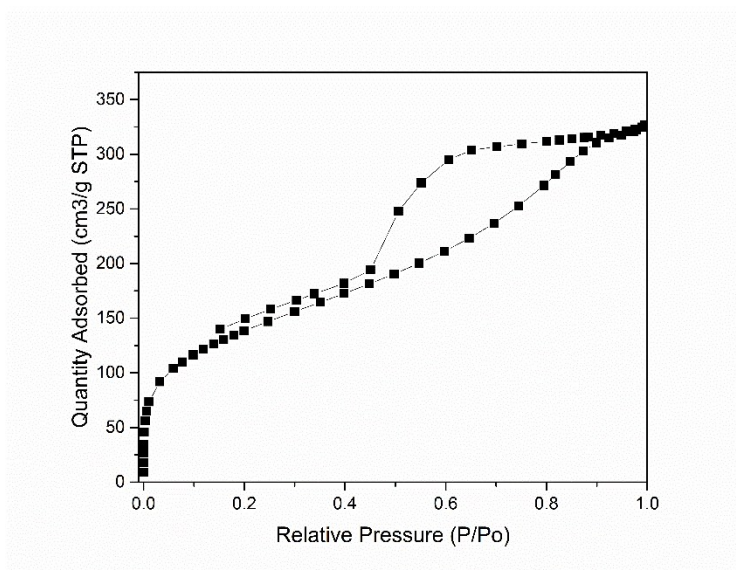

**Figure S2** N<sub>2</sub> sorption isotherm of the recycled co-catalyst system P(DVB-0.2-VBS)/P(DVB-0.2-VBA)

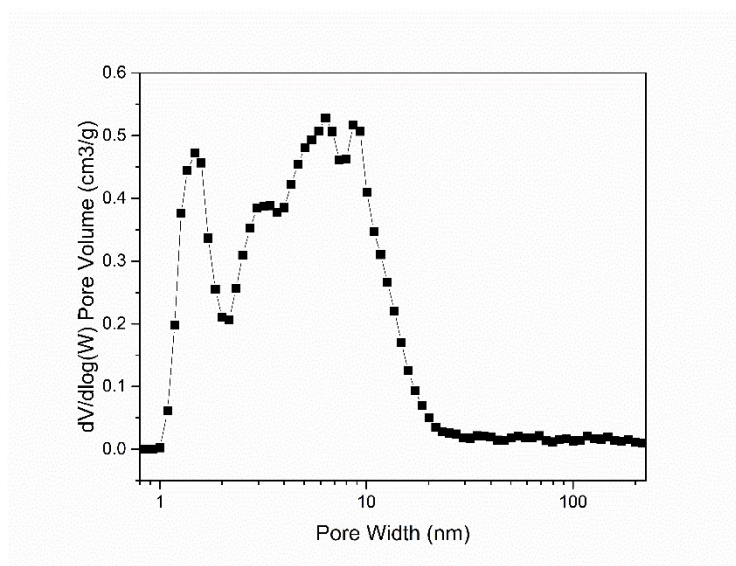

**Figure S3** pore size distribution of the recycled co-catalyst system P(DVB-0.2-VBS)/P(DVB-0.2-VBA)

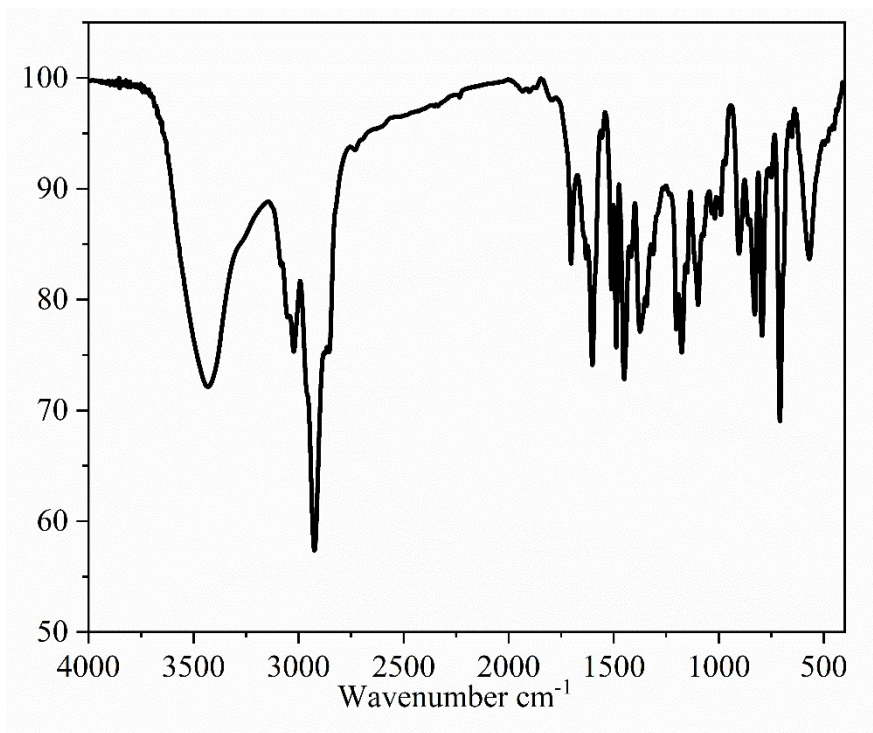

**Figure S4** FT-IR spectra of the recycled co-catalyst system P(DVB-0.2-VBS)/P(DVB-0.2-VBA)

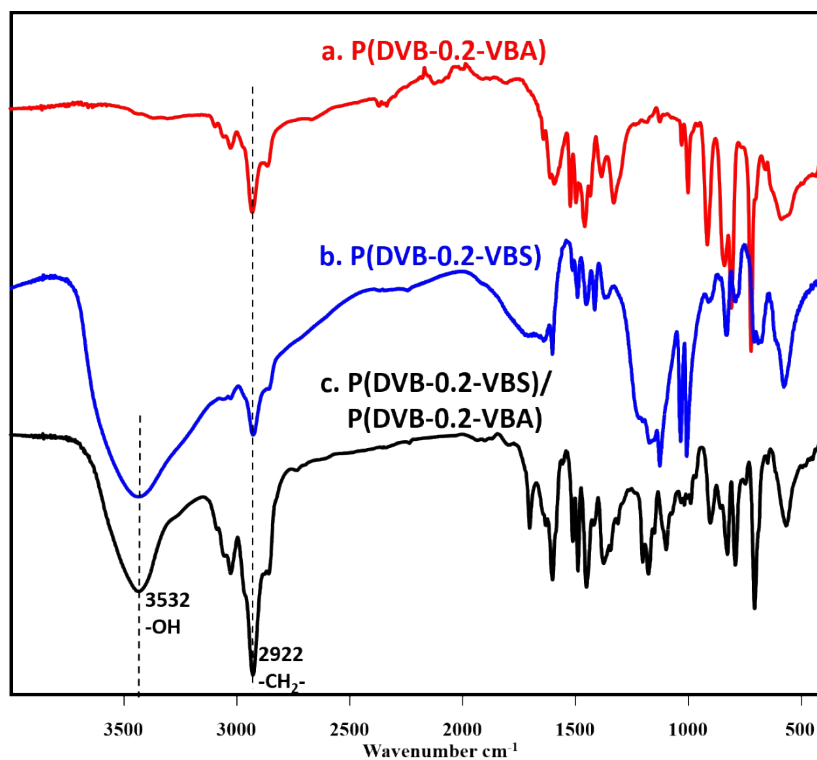

**Figure S5** FT-IR spectra of P(DVB-0.2-VBA)(a), P(DVB-0.2-VBS)(b) and the recycled co-catalyst system P(DVB-0.2-VBS)/P(DVB-0.2-VBA)(c)

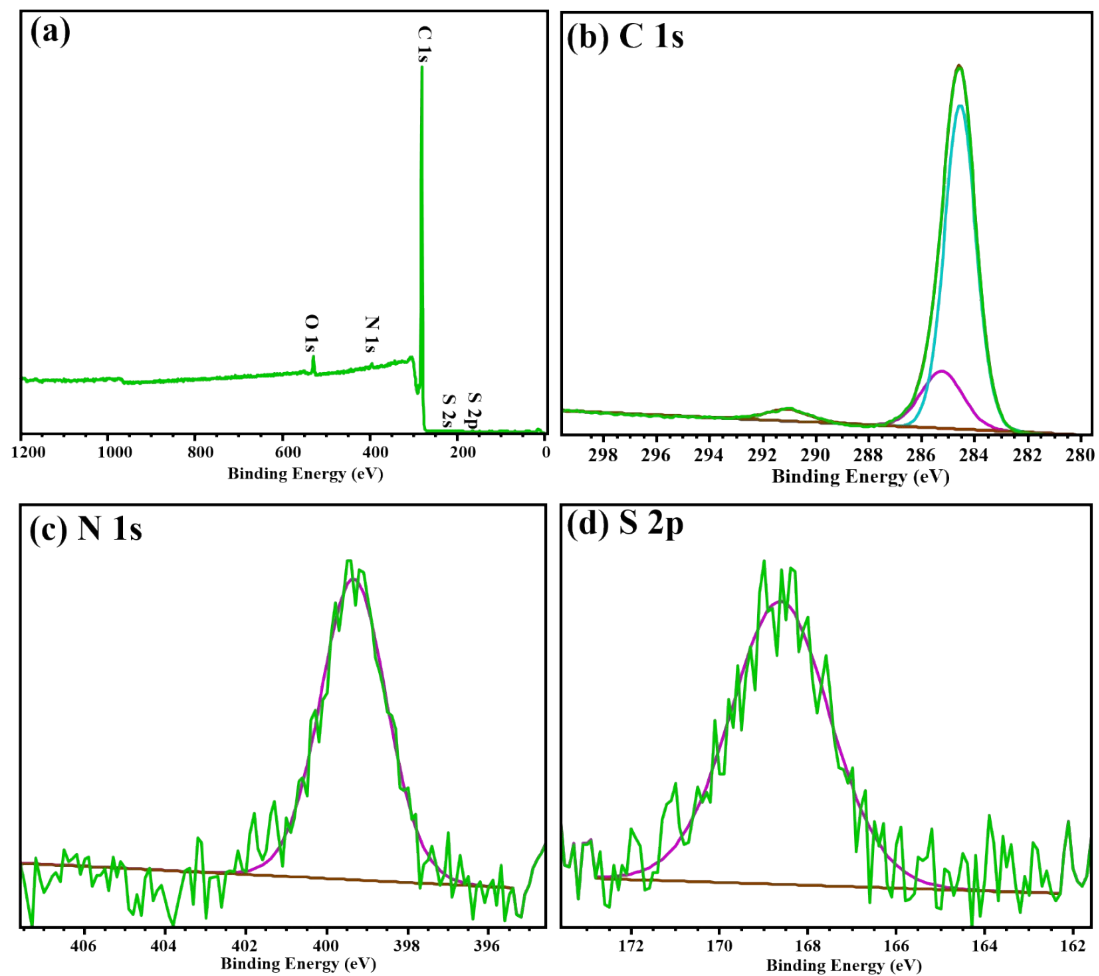

Figure S6 XPS spectra of the recycled co-catalyst system P(DVB-0.2-VBS)/P(DVB-0.2-VBA)

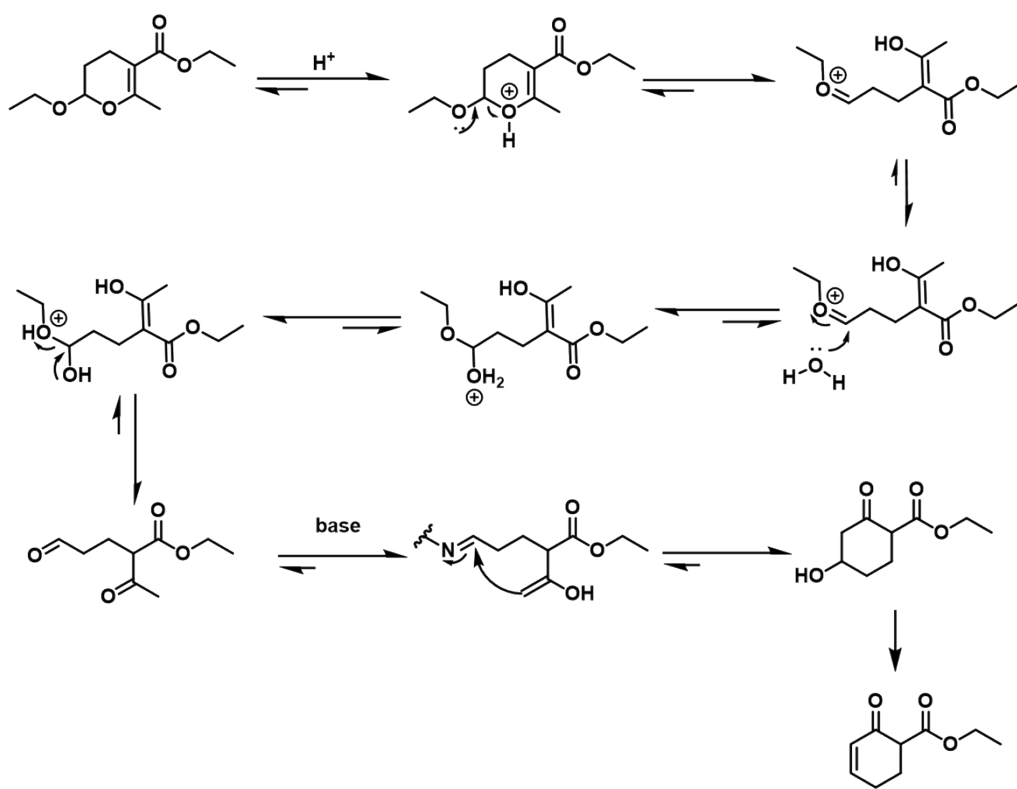

**Figure S7** the plausible mechanism of reaction.

### General procedure for preparing substrates 4a–4g

The procedure for preparing substrates **4a–4g** were according to the reported method.<sup>1</sup> In a typical procedure, aqueous formaldehyde (0.203 g, 2.5 mmol, 37 wt% in H<sub>2</sub>O) was mixed with vinyl ethyl ether (0.072 g, 1.0 mmol) and ethyl acetoacetate (0.260mg, 2.0 mmol) under air. The mixture was then stirred for 3 hours at 80 °C. After reaction completion, the products were extracted from water with a solution of ethyl acetate and heptane (1:4 v/v, 6 mL × 2). After concentration of the organic phases, the crude compound **4a** were purified by flash chromatography over silica gel (eluting solvent: ethyl acetate/petroether = 1/8 (v/v)). The synthesis procedure of **4b–4g** are similar to this method. The yields of **4a–4g** are listed in **Table S1**.

**Table S1** summary of substrates **4a–4g**.

Reaction scheme: Vinyl ethyl ether + CH<sub>2</sub>O + R<sup>2</sup>-C(=O)-CH<sub>2</sub>-C(=O)-OR<sup>1</sup>  $\xrightarrow[3\text{ h}]{80\text{ }^\circ\text{C}}$  4

| entry | substrate | isolated yield |
|-------|-----------|----------------|
| 1     |           | 4a 88          |
| 2     |           | 4b 85          |
| 3     |           | 4c 83          |
| 4     |           | 4d 78          |
| 5     |           | 4e 80          |
| 6     |           | 4f 70          |
| 7     |           | 4g 89          |

1. Y. Gu, R. De Sousa, G. Frapper, C. Bachmann, J. Barrault and F. Jérôme, *Green Chem.*, 2009, **11**, 1968-1972.

### Spectroscopic data of compounds

**phenyl 4-vinylbenzenesulfonate (PVBS)**: yellow crystals.  $^1\text{H}$  NMR (400 MHz,  $\text{CDCl}_3$ , 25 °C, TMS):  $\delta = 7.77$  (d,  $J = 8.3$  Hz, 2H), 7.51 (d,  $J = 8.2$  Hz, 2H), 7.26 (dq,  $J = 14.3, 7.0$  Hz, 3H), 6.99 (d,  $J = 7.8$  Hz, 2H), 6.75 (dd,  $J = 17.6, 10.9$  Hz, 1H), 5.91 (d,  $J = 17.6$  Hz, 1H), 5.48 (d,  $J = 10.9$  Hz, 1H).  $^{13}\text{C}$  NMR (101 MHz,  $\text{CDCl}_3$ , 25 °C):  $\delta = 149.66, 143.32, 135.16, 134.12, 129.69, 128.90, 127.20, 126.71, 122.41, 118.13$  ppm.

**2-(4-vinylbenzyl)isoindoline-1,3-dione**: white solid.  $^1\text{H}$  NMR (400 MHz,  $\text{CDCl}_3$ , 25 °C, TMS):  $\delta = 7.84$  (dt,  $J = 7.0, 3.5$  Hz, 2H), 7.78 – 7.61 (m, 2H), 7.37 (q,  $J = 8.2$  Hz, 4H), 6.67 (dd,  $J = 17.6, 10.9$  Hz, 1H), 5.71 (d,  $J = 17.6$  Hz, 1H), 5.22 (d,  $J = 10.9$  Hz, 1H), 4.83 (s, 2H).  $^{13}\text{C}$  NMR (101 MHz,  $\text{CDCl}_3$ , 25 °C):  $\delta = 168.13, 137.31, 136.42, 135.96, 134.10, 132.22, 128.98, 126.60, 123.46, 114.27, 41.45$  ppm.

**(4-vinylphenyl)methanamine**: yellow oil.  $^1\text{H}$  NMR (400 MHz,  $\text{CDCl}_3$ , 25 °C, TMS):  $\delta = 7.38$  (d,  $J = 8.1$  Hz, 2H), 7.27 (d,  $J = 8.3$  Hz, 2H), 6.71 (dd,  $J = 17.6, 10.9$  Hz, 1H), 5.73 (d,  $J = 17.6$  Hz, 1H), 5.22 (d,  $J = 10.9$  Hz, 1H), 3.85 (s, 2H).

**4-Vinylbenzylamine hydrochloride (VBAH)**: white solid.  $^1\text{H}$  NMR (400 MHz,  $\text{D}_2\text{O}$ , 25 °C):  $\delta = 7.62$  (d,  $J = 7.8$  Hz, 2H), 7.46 (dd,  $J = 17.9, 9.0$  Hz, 2H), 6.87 (dd,  $J = 17.7, 11.0$  Hz, 1H), 5.95 (d,  $J = 17.7$  Hz, 1H), 5.42 (d,  $J = 10.9$  Hz, 1H), 4.21 (d,  $J = 11.1$  Hz, 2H), 1.52 (s, 1H).

**(E)-(2-nitrovinyl)benzene**: colorless solid.  $^1\text{H}$  NMR (400 MHz,  $\text{CDCl}_3$ , 25 °C, TMS):  $\delta = 8.01$  (d,  $J = 13.7$  Hz, 1H), 7.59 (d,  $J = 13.7$  Hz, 1H), 7.56 (d,  $J = 6.9$  Hz, 2H), 7.53 – 7.42 (m, 3H).

**ethyl (E)-2-cyano-3-phenylacrylate**: yellow solid.  $^1\text{H}$  NMR (400 MHz,  $\text{CDCl}_3$ , 25 °C, TMS):  $\delta = 8.25$  (s, 1H), 7.99 (d,  $J = 7.4$  Hz, 2H), 7.52 (dt,  $J = 14.6, 7.1$  Hz, 3H), 4.39 (q,  $J = 7.1$  Hz, 2H), 1.40 (t,  $J = 7.1$  Hz, 3H).

**ethyl (E)-3-(4-bromophenyl)-2-cyanoacrylate**: colorless solid.  $^1\text{H}$  NMR (400 MHz,  $\text{CDCl}_3$ , 25 °C, TMS)  $\delta = 8.18$  (s, 1H), 7.85 (d,  $J = 8.5$  Hz, 2H), 7.65 (d,  $J = 8.6$  Hz, 2H), 4.39 (q,  $J = 7.1$  Hz, 2H), 1.40 (t,  $J = 7.1$  Hz, 3H).

**ethyl (E)-2-cyano-3-(4-nitrophenyl)acrylate:** colorless solid.  $^1\text{H}$  NMR (400 MHz,  $\text{CDCl}_3$ , 25 °C, TMS)  $\delta$  = 8.35 (d,  $J$  = 8.6 Hz, 2H), 8.30 (s, 1H), 8.13 (d,  $J$  = 8.6 Hz, 2H), 4.43 (q,  $J$  = 7.2 Hz, 2H), 1.42 (t,  $J$  = 7.1 Hz, 3H).

**ethyl (E)-2-cyano-3-(2-methoxyphenyl)acrylate:** colorless solid.  $^1\text{H}$  NMR (400 MHz,  $\text{CDCl}_3$ , 25 °C, TMS)  $\delta$  = 8.76 (s, 1H), 8.29 (dd,  $J$  = 7.9, 1.5 Hz, 1H), 7.52 (s, 1H), 7.06 (s, 1H), 6.96 (d,  $J$  = 8.3 Hz, 1H), 4.38 (q,  $J$  = 7.1 Hz, 2H), 3.91 (s, 3H), 1.40 (t,  $J$  = 7.1 Hz, 3H).

**ethyl (E)-2-cyano-3-(2-nitrophenyl)acrylate:** colorless solid.  $^1\text{H}$  NMR (400 MHz,  $\text{CDCl}_3$ , 25 °C, TMS)  $\delta$  = 8.72 (s, 1H), 8.28 (d,  $J$  = 8.2 Hz, 1H), 7.87 (d,  $J$  = 7.6 Hz, 1H), 7.81 (t,  $J$  = 7.5 Hz, 1H), 7.72 (t,  $J$  = 7.8 Hz, 1H), 4.43 (q,  $J$  = 7.2 Hz, 2H), 1.42 (t,  $J$  = 7.1 Hz, 3H).

**2-benzylidenemalononitrile:** yellow solid.  $^1\text{H}$  NMR (400 MHz,  $\text{CDCl}_3$ , 25 °C, TMS)  $\delta$  = 7.91 (dd,  $J$  = 8.2, 0.8 Hz, 2H), 7.78 (s, 1H), 7.67 – 7.60 (m, 1H), 7.55 (t,  $J$  = 7.6 Hz, 2H).

**methyl 2-ethoxy-6-methyl-3,4-dihydro-2H-pyran-5-carboxylate:** colorless oil.  $^1\text{H}$  NMR (400 MHz,  $\text{CDCl}_3$ , 25 °C, TMS)  $\delta$  = 5.03 (dd,  $J$  = 4.2, 2.6 Hz, 1H), 3.85 (dq,  $J$  = 9.7, 7.1 Hz, 1H), 3.76 – 3.63 (m, 3H), 3.59 (dq,  $J$  = 9.7, 7.1 Hz, 1H), 2.44 – 2.25 (m, 2H), 2.23 (dd,  $J$  = 4.5, 3.0 Hz, 3H), 1.94 – 1.79 (m, 1H), 1.79 – 1.67 (m, 1H), 1.21 (t,  $J$  = 7.1 Hz, 3H).  $^{13}\text{C}$  NMR (101 MHz,  $\text{CDCl}_3$ , 25 °C):  $\delta$  = 168.71, 161.86, 101.84, 97.82, 64.15, 50.94, 26.14, 19.89, 17.86, 15.11 ppm.

**ethyl 2-ethoxy-6-methyl-3,4-dihydro-2H-pyran-5-carboxylate:** colorless oil.  $^1\text{H}$  NMR (400 MHz,  $\text{CDCl}_3$ , 25 °C, TMS)  $\delta$  = 5.03 (dd,  $J$  = 4.3, 2.7 Hz, 1H), 4.17 (dq,  $J$  = 14.2, 7.1 Hz, 2H), 3.86 (dq,  $J$  = 9.7, 7.1 Hz, 1H), 3.60 (dq,  $J$  = 9.7, 7.1 Hz, 1H), 2.46 – 2.27 (m, 2H), 2.24 (dd,  $J$  = 4.0, 2.6 Hz, 3H), 1.91 – 1.69 (m, 2H), 1.27 (t,  $J$  = 7.1 Hz, 3H), 1.22 (t,  $J$  = 7.1 Hz, 3H).  $^{13}\text{C}$  NMR (101 MHz,  $\text{CDCl}_3$ , 25 °C):  $\delta$  = 168.36, 161.57, 102.16, 97.89, 64.19, 59.64, 26.25, 19.94, 17.98, 15.17, 14.44 ppm.

**allyl 2-ethoxy-6-methyl-3,4-dihydro-2H-pyran-5-carboxylate:** colorless oil.  $^1\text{H}$  NMR (400 MHz,  $\text{CDCl}_3$ , 25 °C, TMS)  $\delta$  = 5.95 (ddt,  $J$  = 17.1, 10.8, 5.5 Hz, 1H), 5.31 (ddd,  $J$  = 17.2, 3.2, 1.6 Hz, 1H), 5.21 (ddd,  $J$  = 10.5, 2.7, 1.3 Hz, 1H), 5.04 (dd,  $J$  = 4.2, 2.6 Hz, 1H), 4.61 (dt,  $J$  = 5.5, 1.5 Hz, 2H), 3.86 (dq,  $J$  = 9.7, 7.1 Hz, 1H), 3.60 (dq,  $J$  =



9.7, 7.1 Hz, 1H), 2.47 – 2.28 (m, 2H), 2.25 (dd,  $J = 3.6, 2.2$  Hz, 3H), 1.94 – 1.83 (m, 1H), 1.83 – 1.69 (m, 1H), 1.23 (q,  $J = 7.3$  Hz, 3H).  $^{13}\text{C}$  NMR (101 MHz,  $\text{CDCl}_3$ , 25 °C):  $\delta = 167.87, 162.16, 132.98, 117.30, 101.83, 97.89, 64.41, 64.20, 26.17, 20.00, 17.88, 15.14$  ppm.

**isopropyl 2-ethoxy-6-methyl-3,4-dihydro-2H-pyran-5-carboxylate:** colorless oil.  $^1\text{H}$  NMR (400 MHz,  $\text{CDCl}_3$ , 25 °C, TMS)  $\delta = 5.26 - 4.85$  (m, 2H), 3.86 (dq,  $J = 14.2, 7.1$  Hz, 1H), 3.59 (dq,  $J = 14.3, 7.1$  Hz, 1H), 2.45 – 2.24 (m, 2H), 2.24 (d,  $J = 16.9$  Hz, 3H), 1.93 – 1.66 (m, 2H), 1.25 (t,  $J = 7.5$  Hz, 6H), 1.21 (d,  $J = 7.1$  Hz, 3H).  $^{13}\text{C}$  NMR (101 MHz,  $\text{CDCl}_3$ , 25 °C):  $\delta = 167.92, 161.24, 102.42, 97.86, 66.76, 64.19, 26.23, 22.09, 21.71, 21.58, 19.95, 18.00, 15.16$  ppm.

**2-methoxyethyl 2-ethoxy-6-methyl-3,4-dihydro-2H-pyran-5-carboxylate:** colorless oil.  $^1\text{H}$  NMR (400 MHz,  $\text{CDCl}_3$ , 25 °C, TMS)  $\delta = 5.02$  (dd,  $J = 4.2, 2.7$  Hz, 1H), 4.30 – 4.14 (m, 2H), 3.84 (dd,  $J = 9.6, 7.1$  Hz, 1H), 3.59 (ddd,  $J = 9.7, 7.1, 3.7$  Hz, 3H), 3.36 (d,  $J = 10.2$  Hz, 3H), 2.46 – 2.27 (m, 2H), 2.24 (d,  $J = 10.7$  Hz, 3H), 1.90 – 1.68 (m, 2H), 1.21 (q,  $J = 6.8$  Hz, 3H).  $^{13}\text{C}$  NMR (101 MHz,  $\text{CDCl}_3$ , 25 °C):  $\delta = 168.17, 162.09, 101.80, 97.88, 70.72, 64.17, 62.83, 58.91, 26.10, 19.96, 17.88, 15.27, 15.11$  ppm.

**benzyl 2-ethoxy-6-methyl-3,4-dihydro-2H-pyran-5-carboxylate:** colorless oil.  $^1\text{H}$  NMR (400 MHz,  $\text{CDCl}_3$ , 25 °C, TMS)  $\delta = 7.50 - 7.21$  (m, 5H), 5.16 (t,  $J = 4.0$  Hz, 2H), 5.04 (d,  $J = 2.3$  Hz, 1H), 3.98 – 3.75 (m, 1H), 3.73 – 3.42 (m, 1H), 2.38 (s, 2H), 2.24 (t,  $J = 11.6$  Hz, 3H), 1.81 (dd,  $J = 26.8, 3.7$  Hz, 2H), 1.23 (dt,  $J = 10.6, 5.8$  Hz, 3H), 0.86 (dd,  $J = 6.6, 3.6$  Hz, 1H).  $^{13}\text{C}$  NMR (101 MHz,  $\text{CDCl}_3$ , 25 °C):  $\delta = 168.09, 162.41, 136.88, 128.53, 127.95, 101.86, 97.99, 65.57, 64.30, 26.22, 20.14, 18.00, 15.22$  ppm.

**ethyl 2-ethoxy-6-ethyl-3,4-dihydro-2H-pyran-5-carboxylate:** colorless oil.  $^1\text{H}$  NMR (400 MHz,  $\text{CDCl}_3$ , 25 °C, TMS)  $\delta = 5.04$  (dd,  $J = 4.0, 2.6$  Hz, 1H), 4.15 (q,  $J = 7.1$  Hz, 2H), 3.87 (dq,  $J = 9.6, 7.1$  Hz, 1H), 3.60 (dq,  $J = 9.6, 7.1$  Hz, 1H), 2.74 (dt,  $J = 14.8, 7.3$  Hz, 1H), 2.66 – 2.47 (m, 1H), 2.45 – 2.23 (m, 2H), 1.84 (ddd,  $J = 10.3, 7.1, 5.1$  Hz, 1H), 1.76 (ddd,  $J = 10.5, 6.6, 3.2$  Hz, 1H), 1.27 (t,  $J = 7.1$  Hz, 3H), 1.22 (t,  $J = 7.1$  Hz,

3H), 1.17 – 1.02 (m, 3H).  $^{13}\text{C}$  NMR (101 MHz,  $\text{CDCl}_3$ , 25 °C):  $\delta$  = 168.25, 166.29, 101.44, 97.70, 64.12, 59.74, 26.52, 26.26, 18.03, 15.23, 14.46, 12.22 ppm.

**ethyl 2-oxocyclohex-3-ene-1-carboxylate**: colorless oil.  $^1\text{H}$  NMR (400 MHz,  $\text{CDCl}_3$ , 25 °C, TMS)  $\delta$  = 6.99 (dt,  $J$  = 10.1, 3.6 Hz, 1H), 6.06 (dt,  $J$  = 10.2, 1.9 Hz, 1H), 4.25 – 4.16 (m, 2H), 3.39 (dd,  $J$  = 9.9, 4.9 Hz, 1H), 2.59 – 2.43 (m, 1H), 2.43 – 2.29 (m, 2H), 2.29 – 2.20 (m, 1H), 1.28 (dd,  $J$  = 9.5, 4.7 Hz, 3H).  $^{13}\text{C}$  NMR (101 MHz,  $\text{CDCl}_3$ , 25 °C):  $\delta$  = 194.03, 170.01, 150.72, 129.06, 61.21, 53.43, 25.62, 24.32, 14.13 ppm.

**methyl 2-oxocyclohex-3-ene-1-carboxylate**: colorless oil.  $^1\text{H}$  NMR (400 MHz,  $\text{CDCl}_3$ , 25 °C, TMS)  $\delta$  = 7.11 – 6.94 (m, 1H), 6.08 (d,  $J$  = 10.2 Hz, 1H), 3.76 (s, 3H), 3.52 – 3.25 (m, 1H), 2.59 – 2.44 (m, 2H), 2.39 (dd,  $J$  = 9.7, 7.0 Hz, 3H), 2.32 – 2.20 (m, 1H).  $^{13}\text{C}$  NMR (101 MHz,  $\text{CDCl}_3$ , 25 °C):  $\delta$  = 193.87, 170.44, 150.80, 129.06, 53.32, 52.33, 25.60, 24.33 ppm.

**allyl 2-oxocyclohex-3-ene-1-carboxylate**: colorless oil.  $^1\text{H}$  NMR (400 MHz,  $\text{CDCl}_3$ , 25 °C, TMS)  $\delta$  = 7.13 – 6.91 (m, 1H), 6.08 (dd,  $J$  = 10.1, 1.9 Hz, 1H), 5.99 – 5.79 (m, 1H), 5.34 (dd,  $J$  = 17.2, 1.4 Hz, 1H), 5.24 (dd,  $J$  = 10.4, 1.2 Hz, 1H), 4.79 – 4.53 (m, 2H), 3.45 (dd,  $J$  = 9.8, 4.6 Hz, 1H), 2.62 – 2.32 (m, 3H), 2.31 – 2.19 (m, 1H).  $^{13}\text{C}$  NMR (101 MHz,  $\text{CDCl}_3$ , 25 °C):  $\delta$  = 193.81, 169.69, 150.71, 131.76, 129.09, 118.47, 65.75, 53.44, 25.65, 24.34 ppm.

**isopropyl 2-oxocyclohex-3-ene-1-carboxylate**: colorless oil.  $^1\text{H}$  NMR (400 MHz,  $\text{CDCl}_3$ , 25 °C, TMS)  $\delta$  = 7.10 – 6.89 (m, 1H), 6.05 (d,  $J$  = 10.1 Hz, 1H), 5.06 (td,  $J$  = 12.5, 6.3 Hz, 1H), 3.35 (dd,  $J$  = 9.6, 5.0 Hz, 1H), 2.55 – 2.44 (m, 1H), 2.37 (dd,  $J$  = 10.6, 7.6 Hz, 2H), 2.26 – 2.18 (m, 1H), 1.25 (t,  $J$  = 6.0 Hz, 6H).  $^{13}\text{C}$  NMR (101 MHz,  $\text{CDCl}_3$ , 25 °C):  $\delta$  = 194.25, 169.99, 150.54, 129.31, 68.89, 53.70, 25.77, 24.43, 21.88, 21.81 ppm.

**benzyl 2-oxocyclohex-3-ene-1-carboxylate**: colorless oil.  $^1\text{H}$  NMR (400 MHz,  $\text{CDCl}_3$ , 25 °C, TMS)  $\delta$  = 7.45 – 7.27 (m, 5H), 7.00 (dt,  $J$  = 9.9, 3.7 Hz, 1H), 6.07 (dd,  $J$  = 10.1, 1.9 Hz, 1H), 5.30 – 5.07 (m, 2H), 3.57 – 3.28 (m, 1H), 2.53 – 2.30 (m, 3H), 2.29 – 2.13 (m, 1H).  $^{13}\text{C}$  NMR (101 MHz,  $\text{CDCl}_3$ , 25 °C):  $\delta$  = 193.83, 169.97, 150.76, 135.72, 129.19, 128.64, 128.34, 128.19, 66.97, 53.58, 25.74, 24.44 ppm.

**2-methoxyethyl 2-oxocyclohex-3-ene-1-carboxylate:** colorless oil.  $^1\text{H}$  NMR (400 MHz,  $\text{CDCl}_3$ , 25 °C, TMS)  $\delta$  = 7.06 – 6.95 (m, 1H), 6.12 – 6.04 (m, 1H), 4.32 (ddd,  $J$  = 6.1, 4.0, 2.3 Hz, 2H), 3.74 – 3.53 (m, 2H), 3.47 (dd,  $J$  = 10.5, 4.9 Hz, 1H), 3.39 (d,  $J$  = 7.7 Hz, 3H), 2.58 – 2.44 (m, 1H), 2.39 (ddd,  $J$  = 11.8, 7.2, 2.3 Hz, 2H), 2.24 (dd,  $J$  = 9.9, 7.2 Hz, 1H).  $^{13}\text{C}$  NMR (101 MHz,  $\text{CDCl}_3$ , 25 °C):  $\delta$  = 193.94, 170.20, 150.77, 129.19, 70.41, 64.23, 59.09, 53.52, 25.75, 24.51 ppm.

**ethyl 3-methyl-2-oxocyclohex-3-ene-1-carboxylate:** colorless oil.  $^1\text{H}$  NMR (400 MHz,  $\text{CDCl}_3$ , 25 °C, TMS)  $\delta$  = 6.74 (d,  $J$  = 1.3 Hz, 1H), 4.20 (qdd,  $J$  = 14.2, 9.0, 5.4 Hz, 2H), 3.42 – 3.34 (m, 1H), 2.53 – 2.28 (m, 3H), 2.23 – 2.11 (m, 1H), 1.79 (d,  $J$  = 1.4 Hz, 3H), 1.27 (t,  $J$  = 7.1 Hz, 3H).  $^{13}\text{C}$  NMR (101 MHz,  $\text{CDCl}_3$ , 25 °C):  $\delta$  = 194.72, 170.45, 145.50, 135.26, 61.16, 53.72, 26.21, 24.48, 16.09, 14.22 ppm.

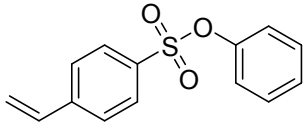

phenyl 4-vinylbenzenesulfonate

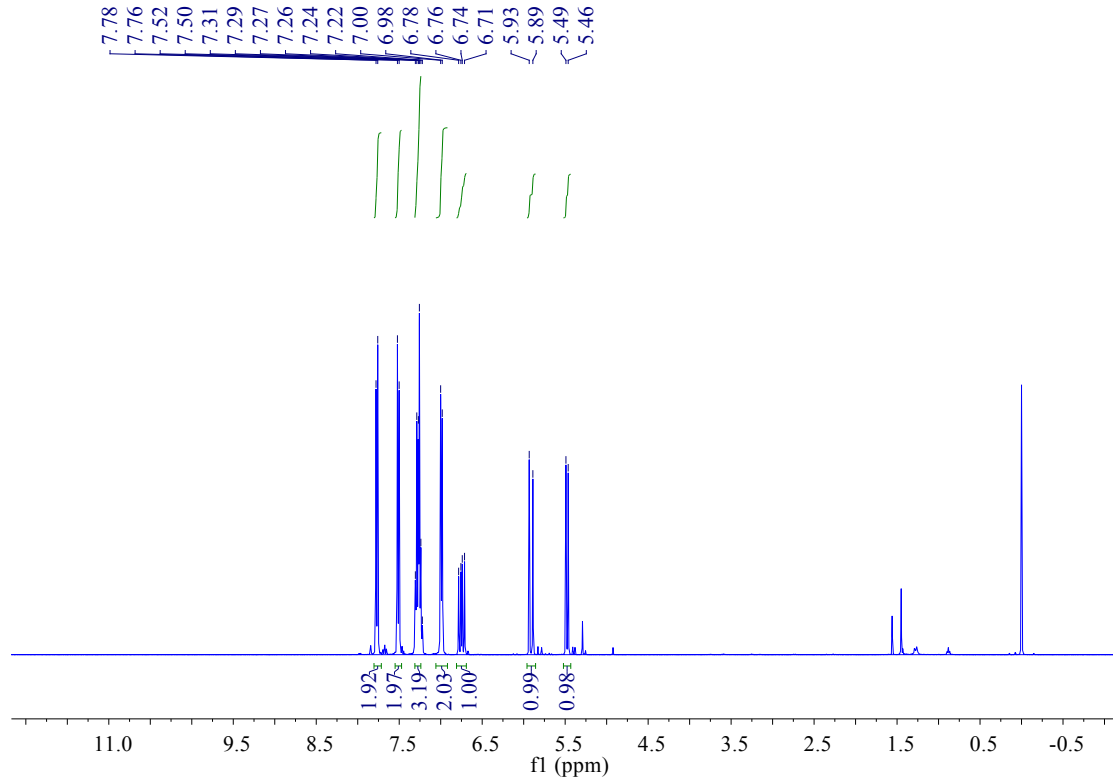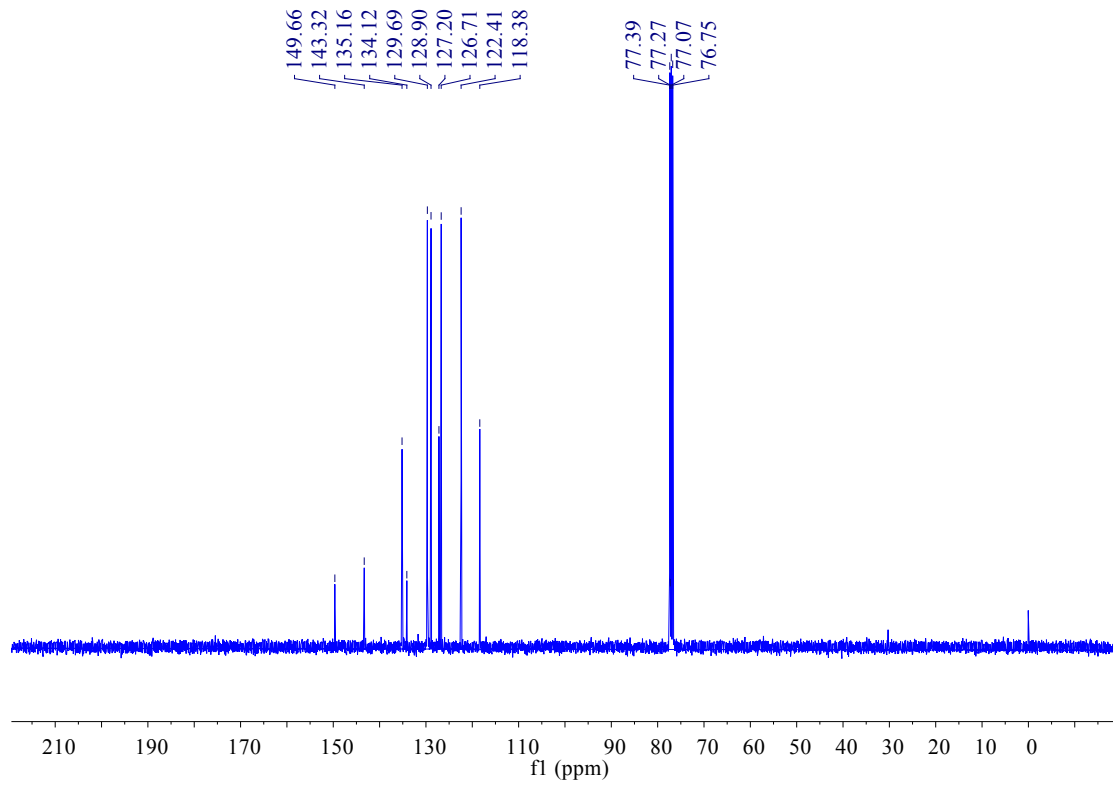

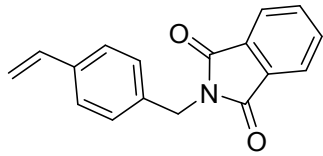

2-(4-vinylbenzyl)isoindoline-1,3-dione

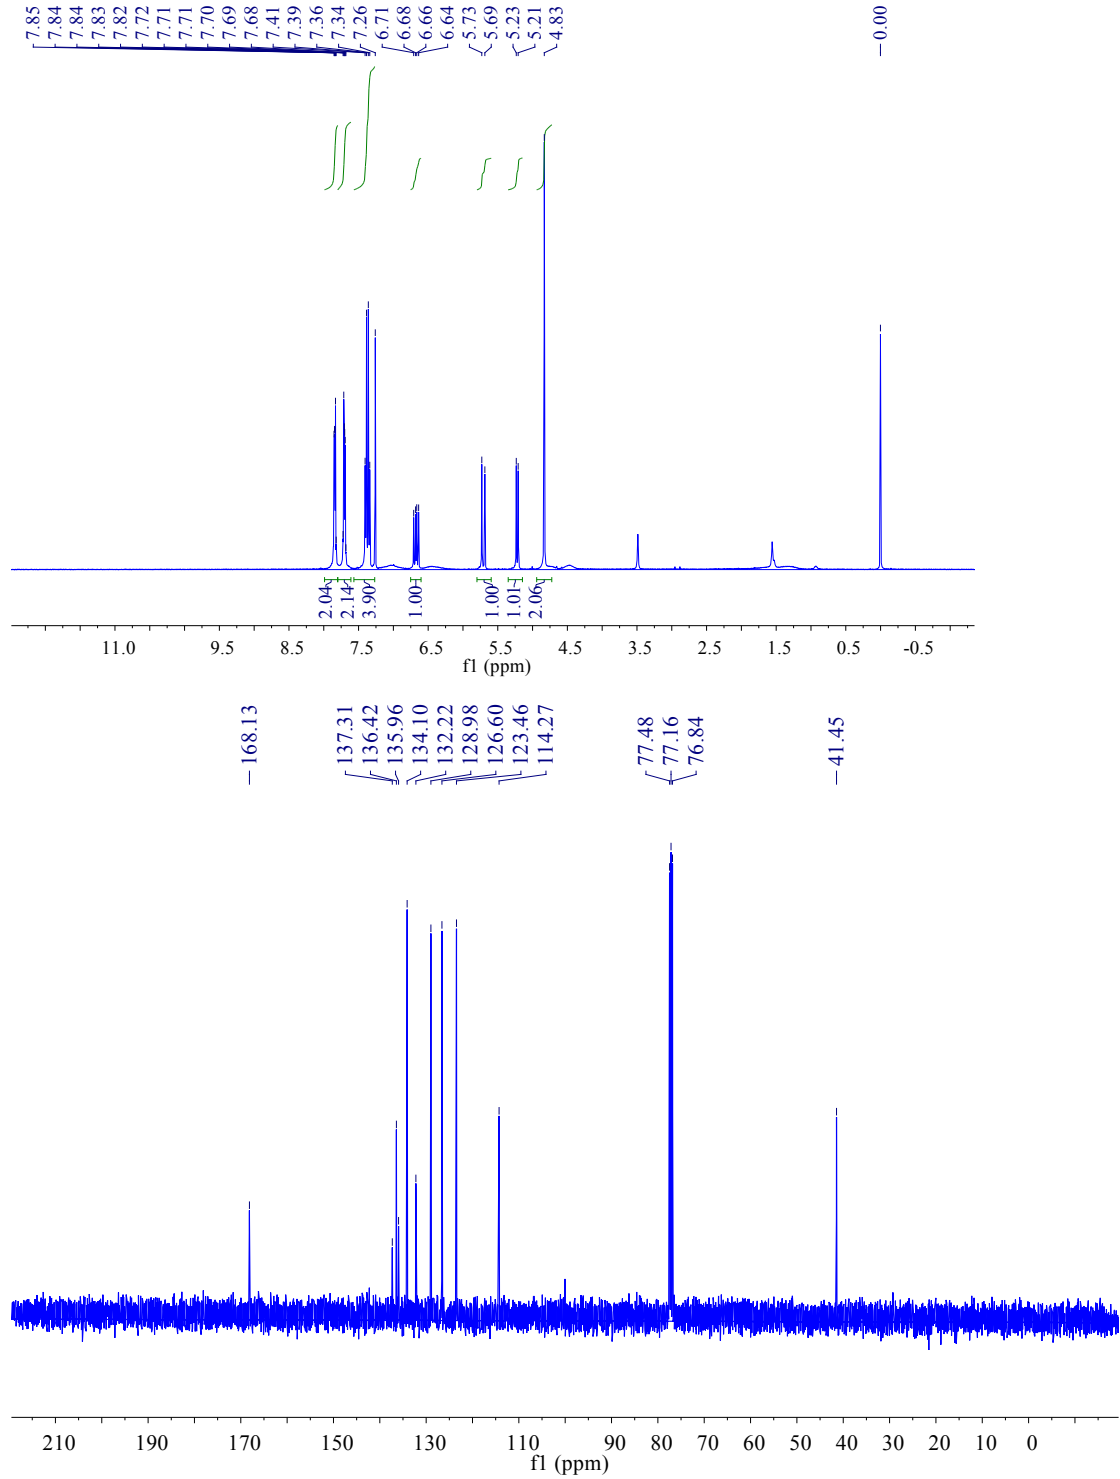

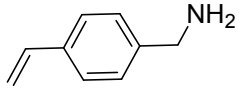

(4-vinylphenyl)methanamine

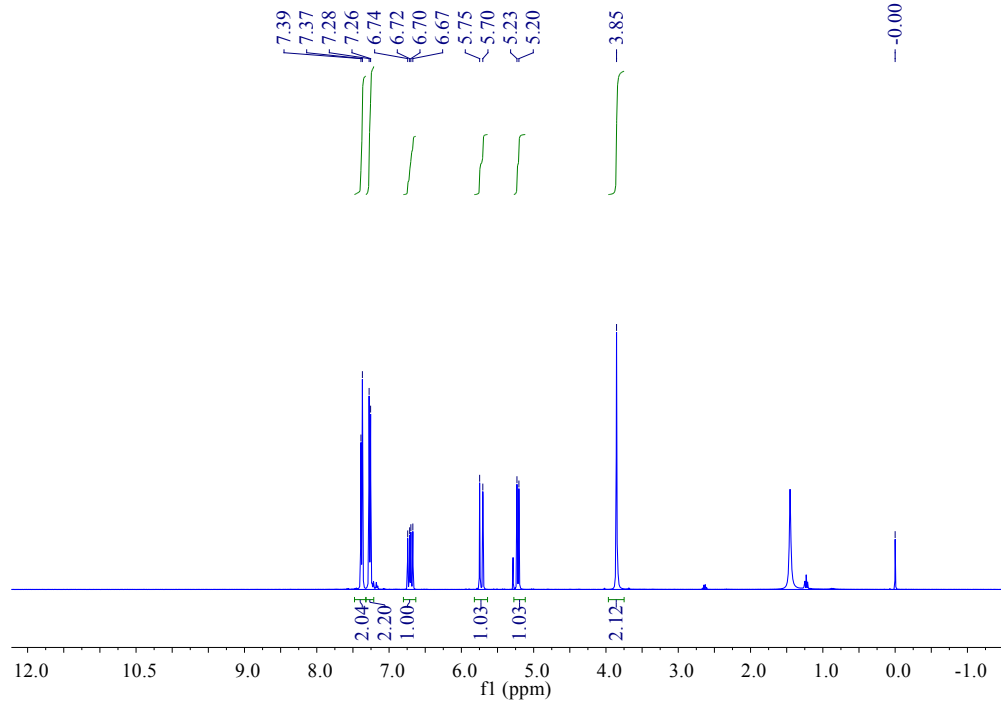

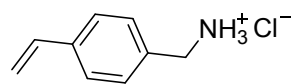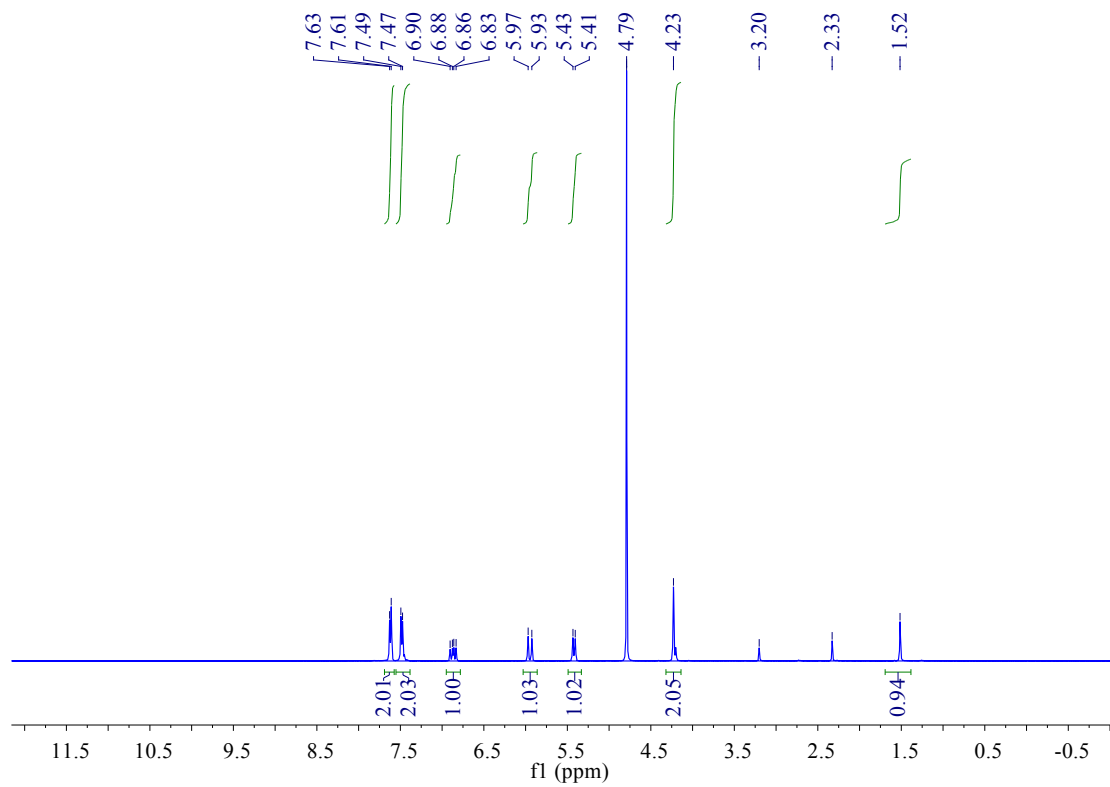

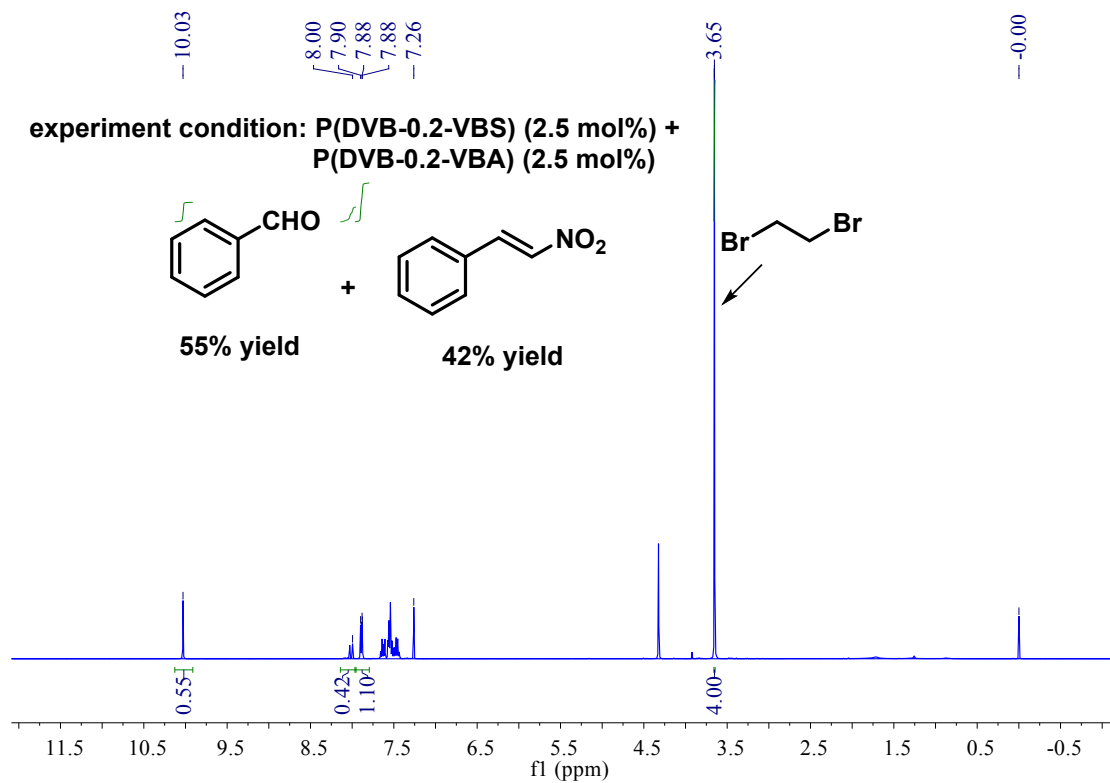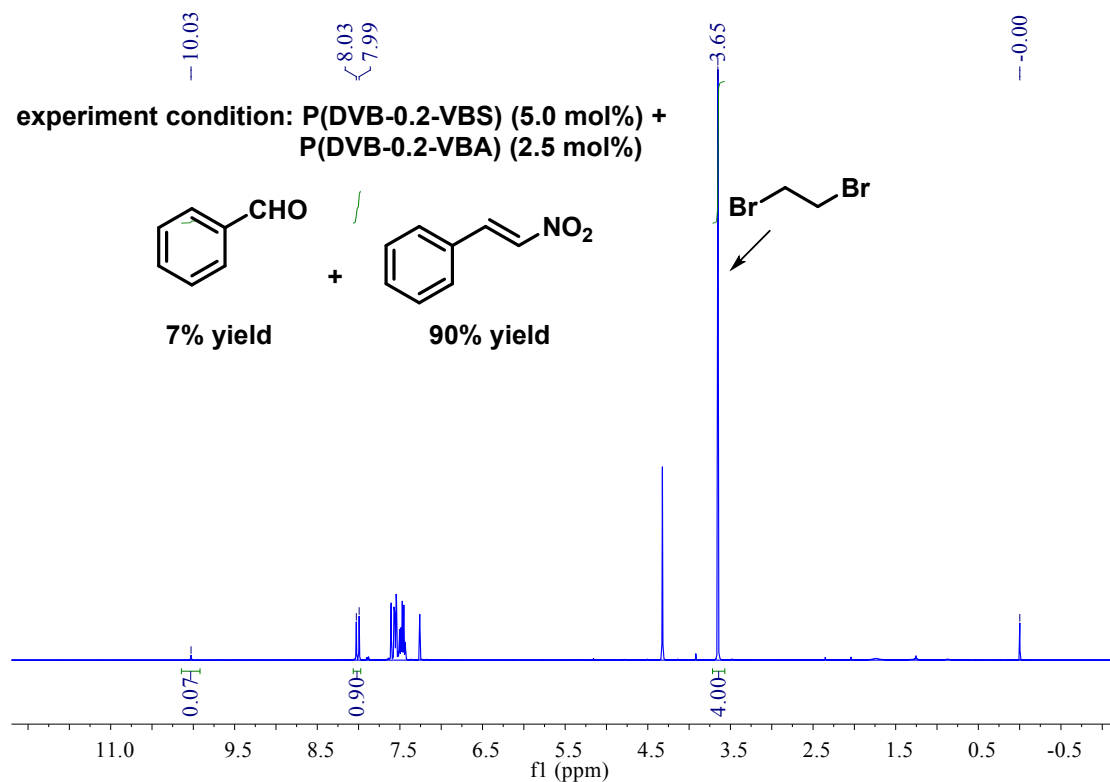



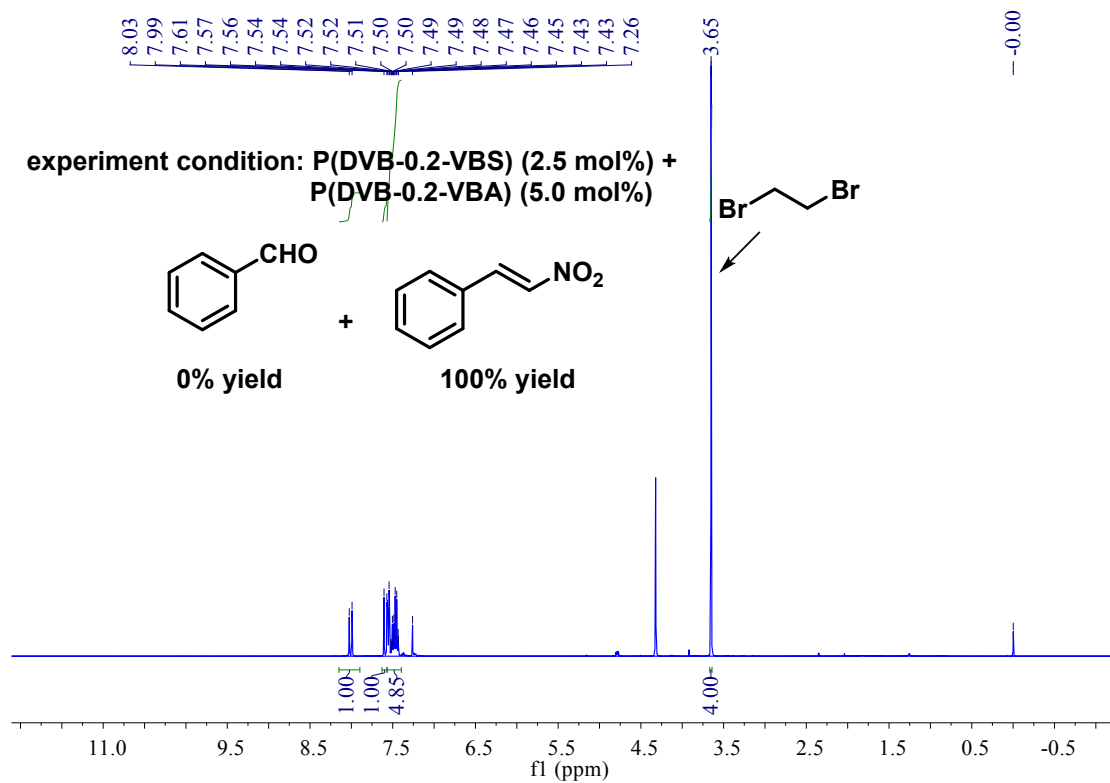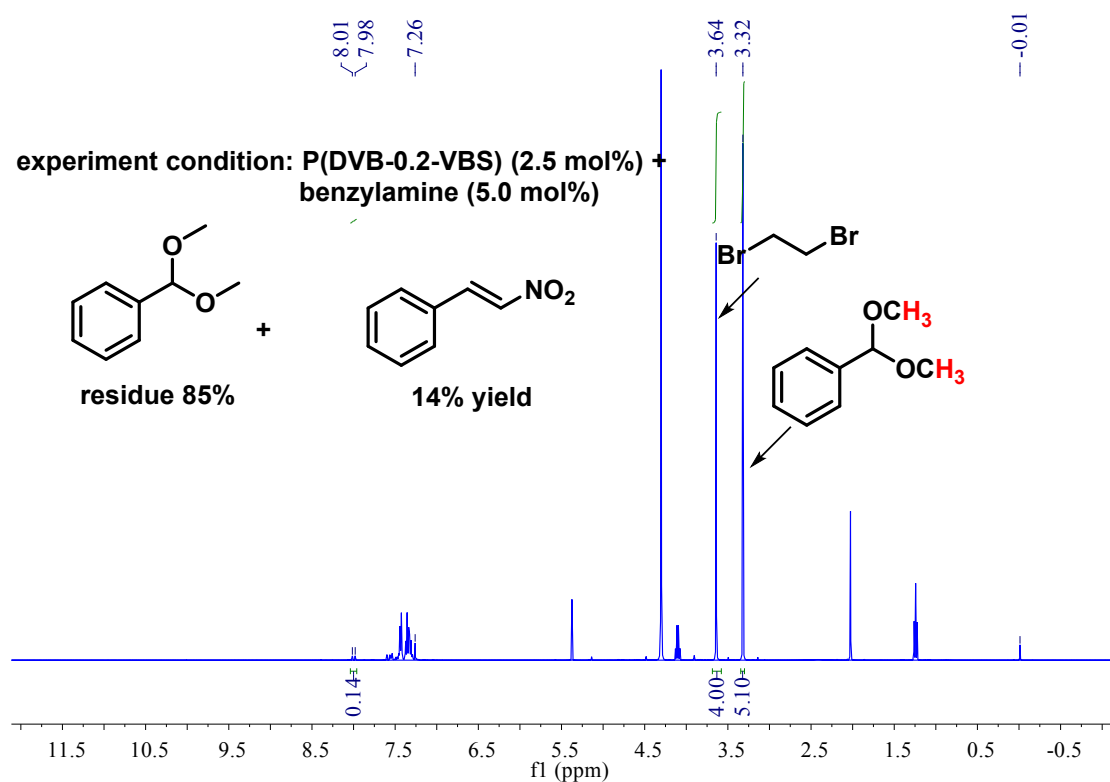

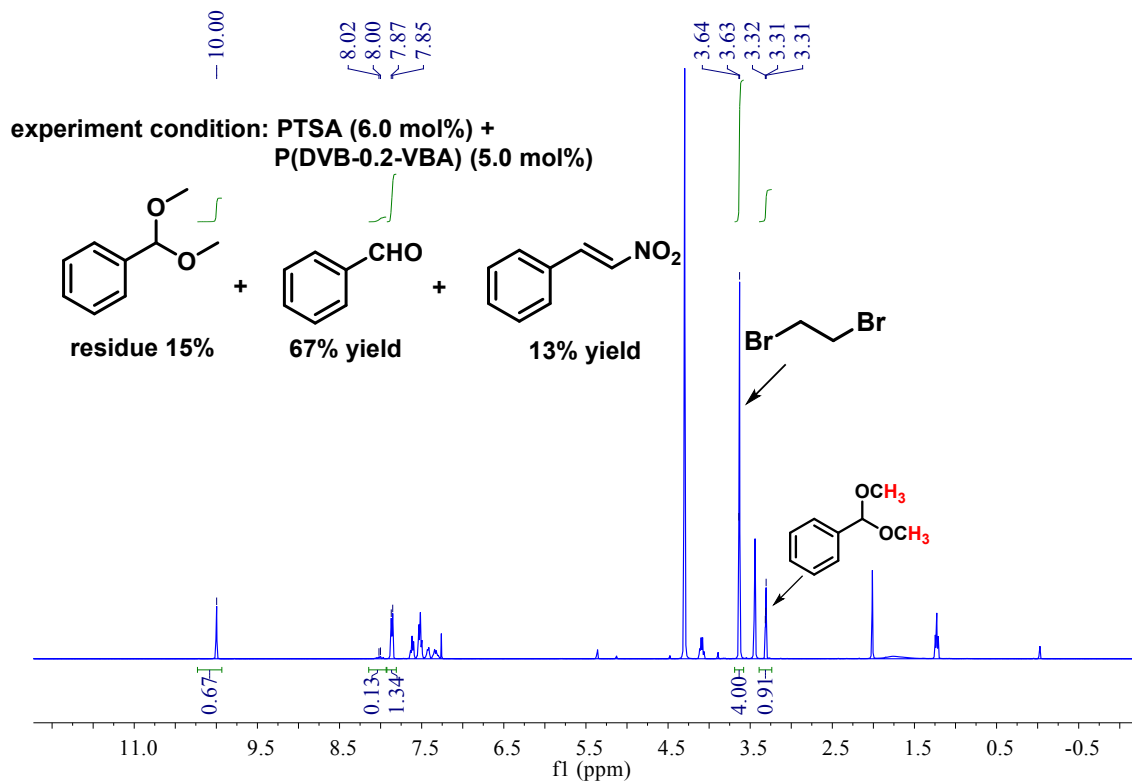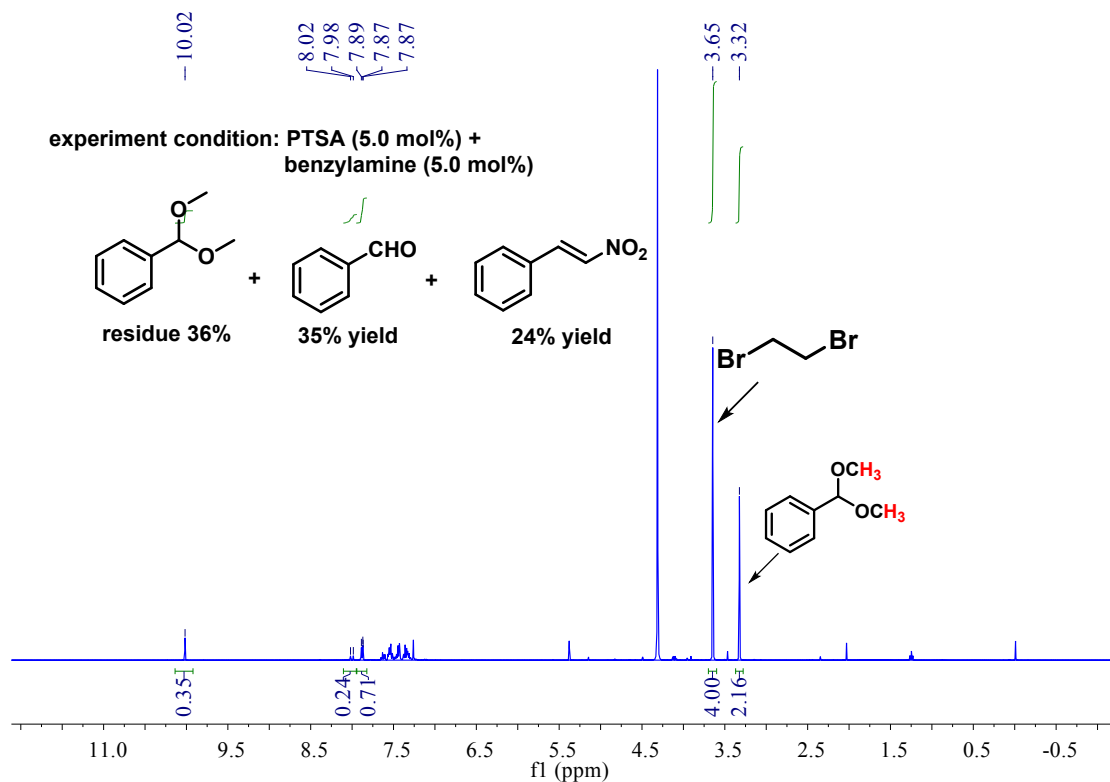

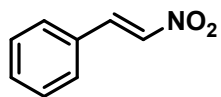

(E)-(2-nitrovinyl)benzene

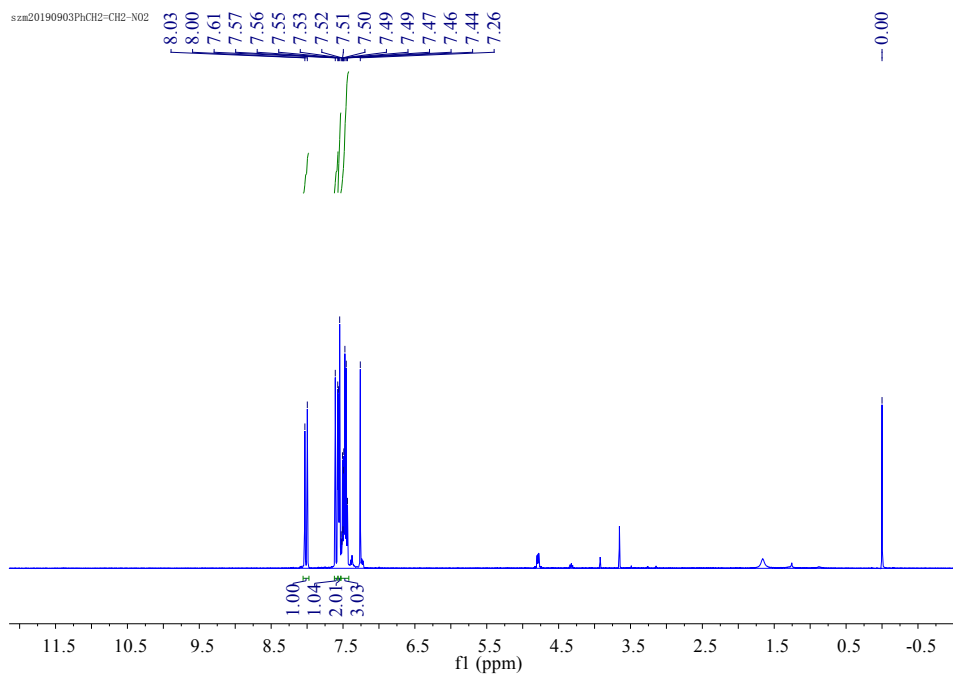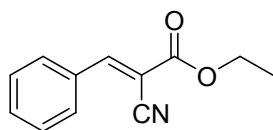

ethyl (E)-2-cyano-3-phenylacrylate

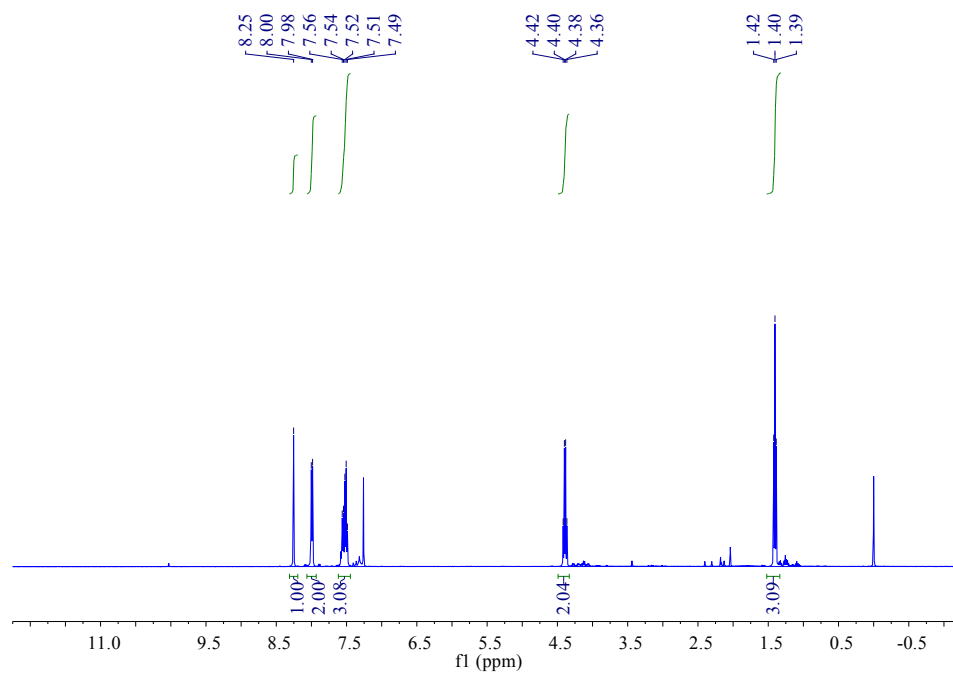

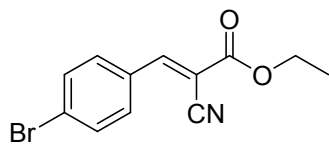

ethyl (*E*)-3-(4-bromophenyl)-2-cyanoacrylate

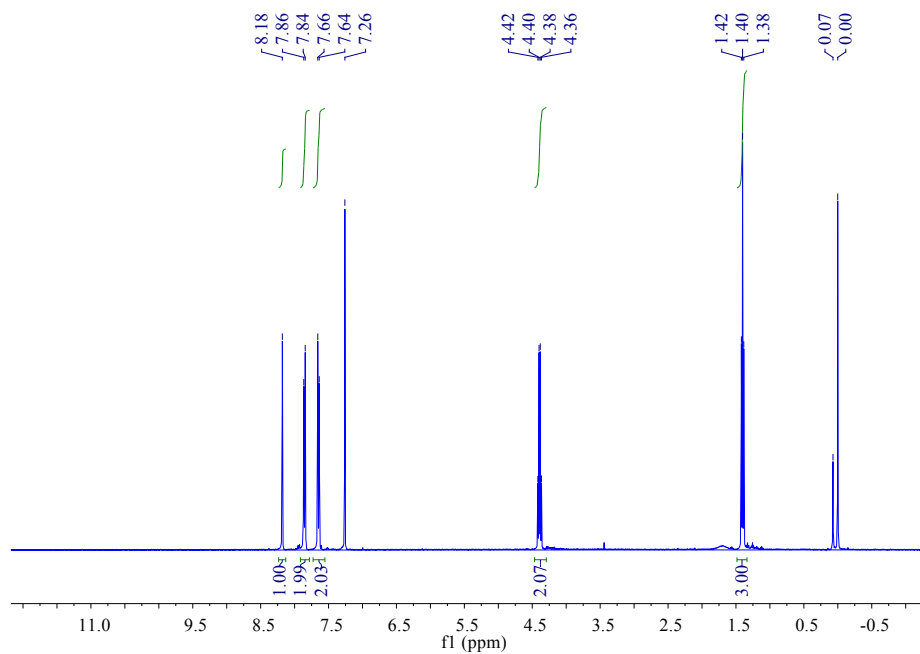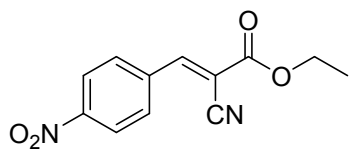

ethyl (*E*)-2-cyano-3-(4-nitrophenyl)acrylate

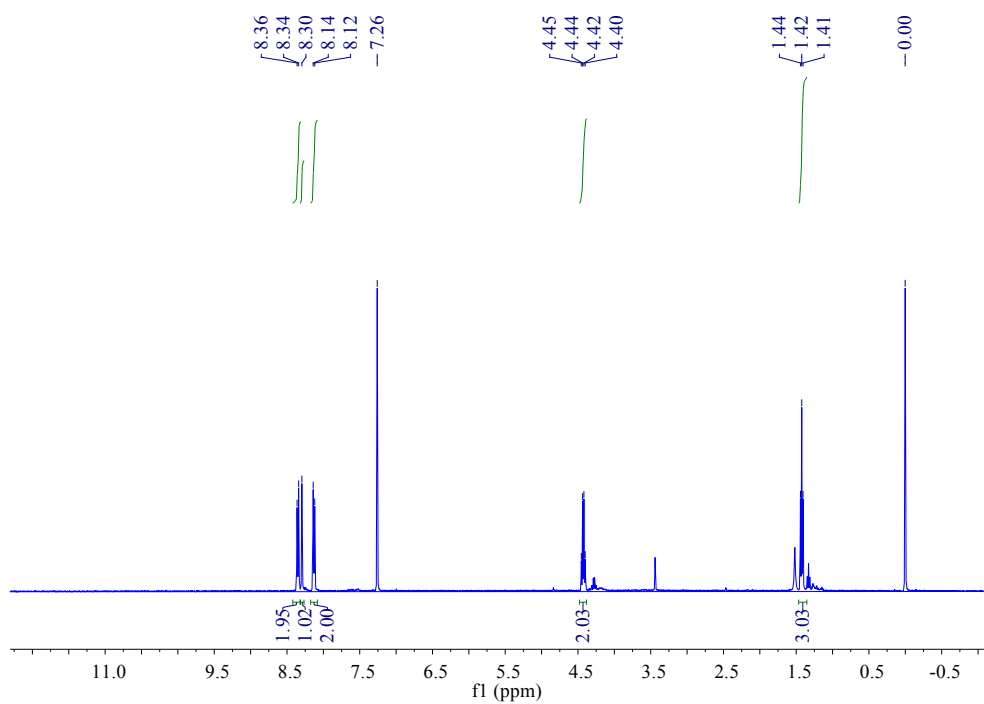

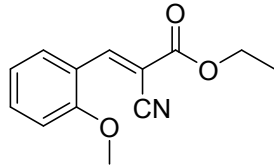

ethyl (*E*)-2-cyano-3-(2-methoxyphenyl)acrylate

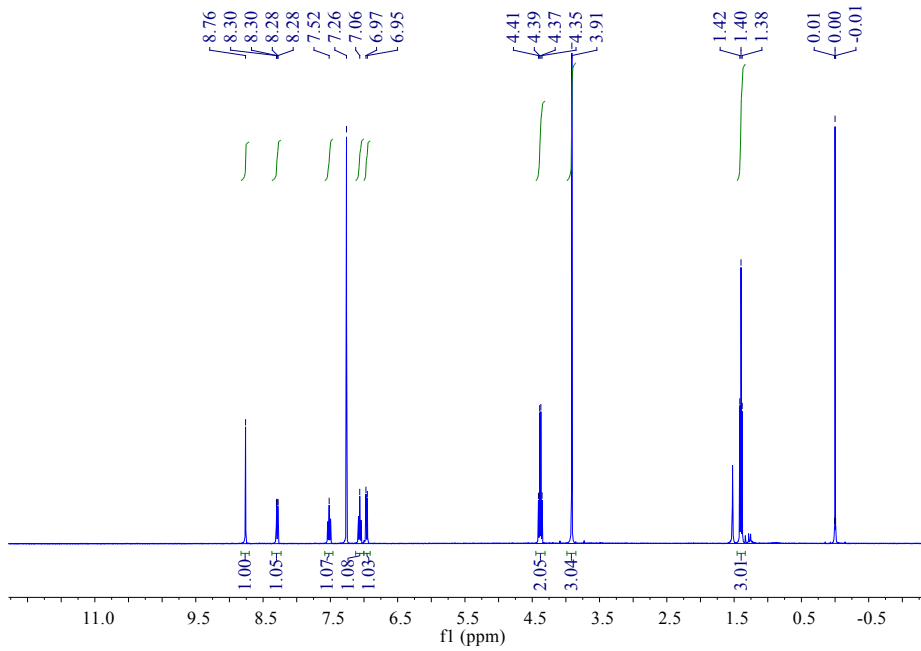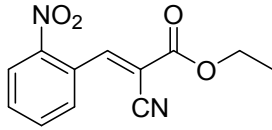

ethyl (*E*)-2-cyano-3-(2-nitrophenyl)acrylate

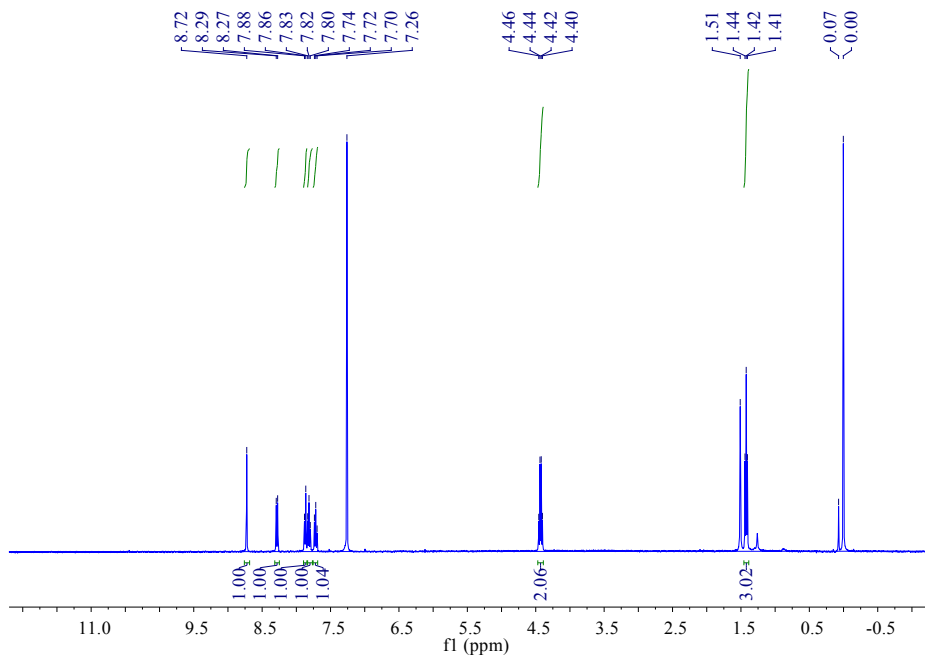

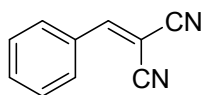

2-benzylidenemalononitrile

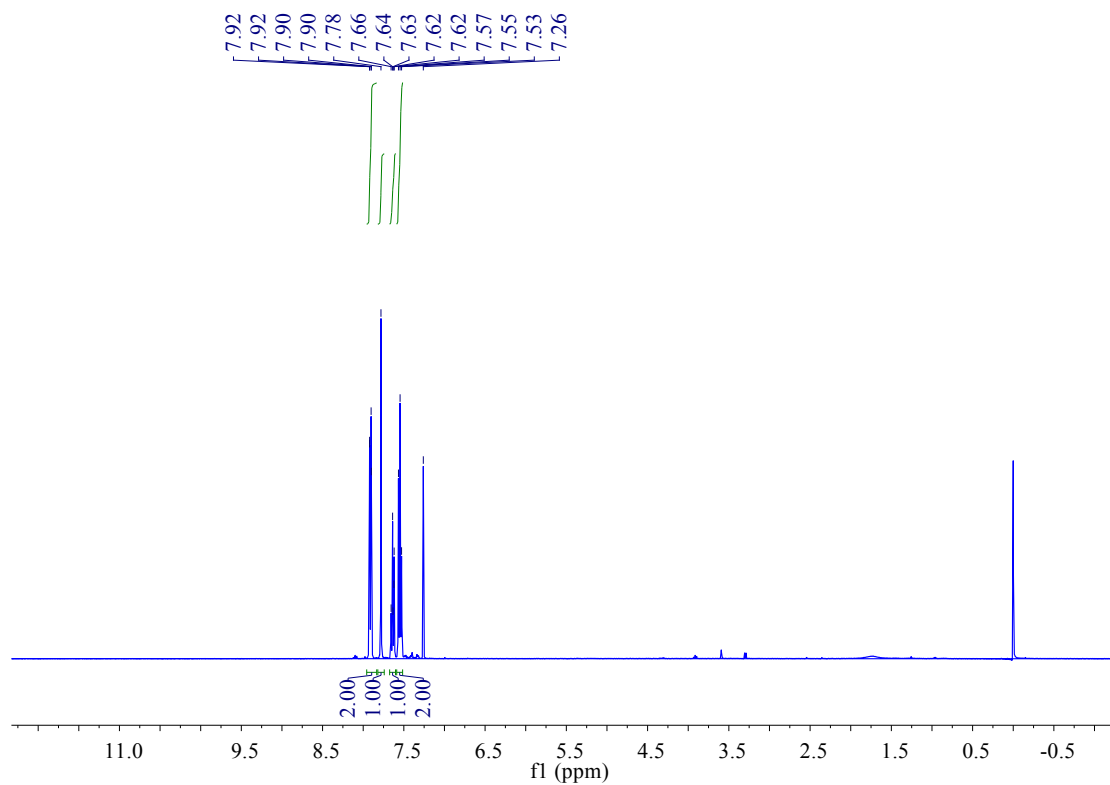

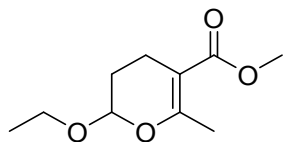

methyl 2-ethoxy-6-methyl-3,4-dihydro-2H-pyran-5-carboxylate

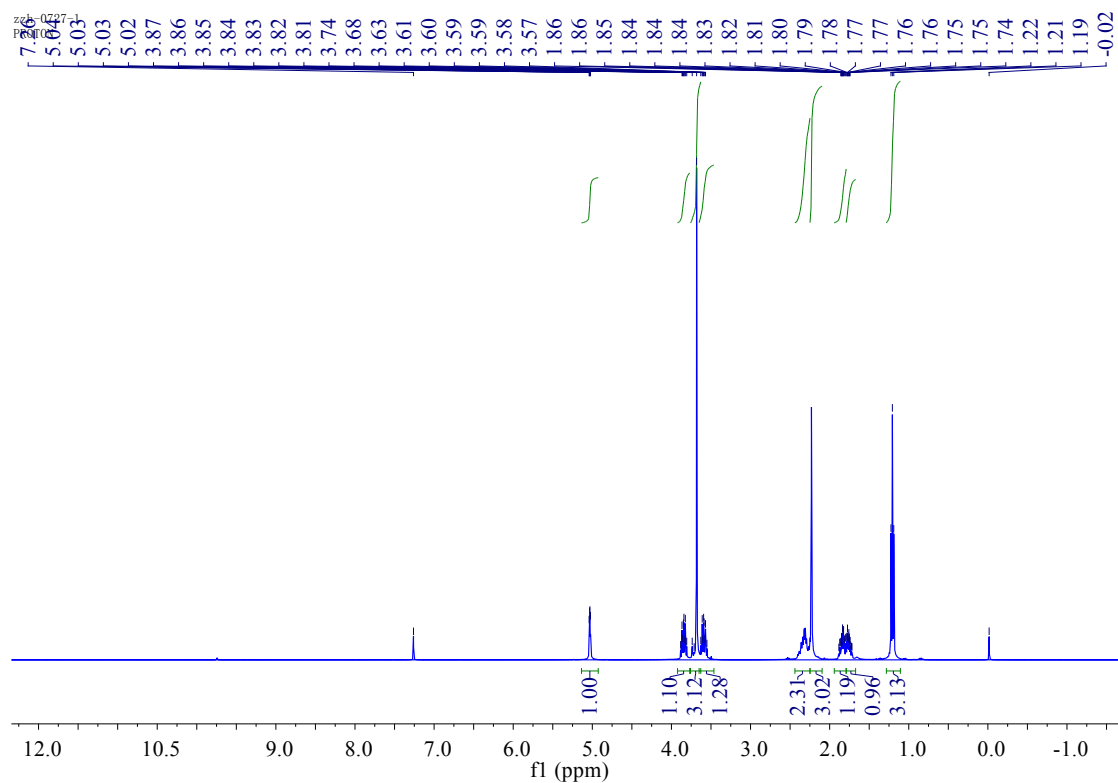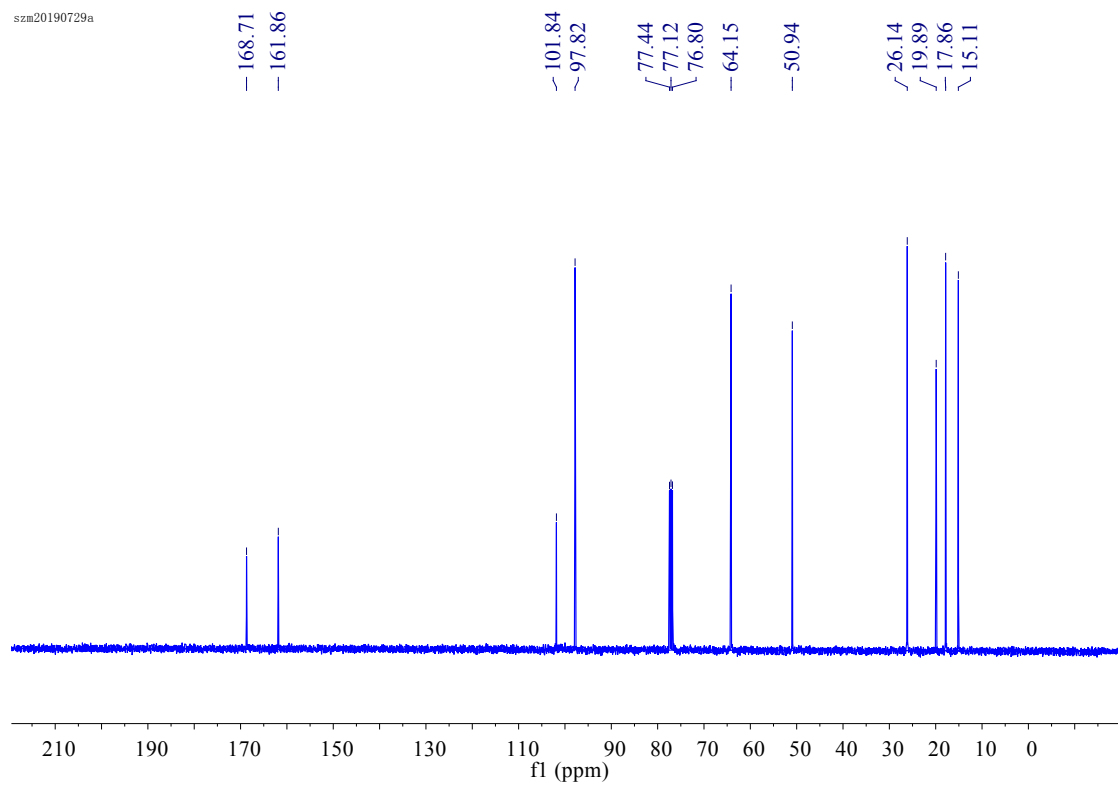

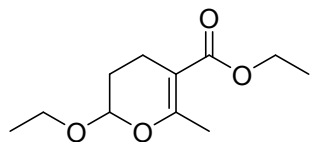

ethyl 2-ethoxy-6-methyl-3,4-dihydro-2H-pyran-5-carboxylate

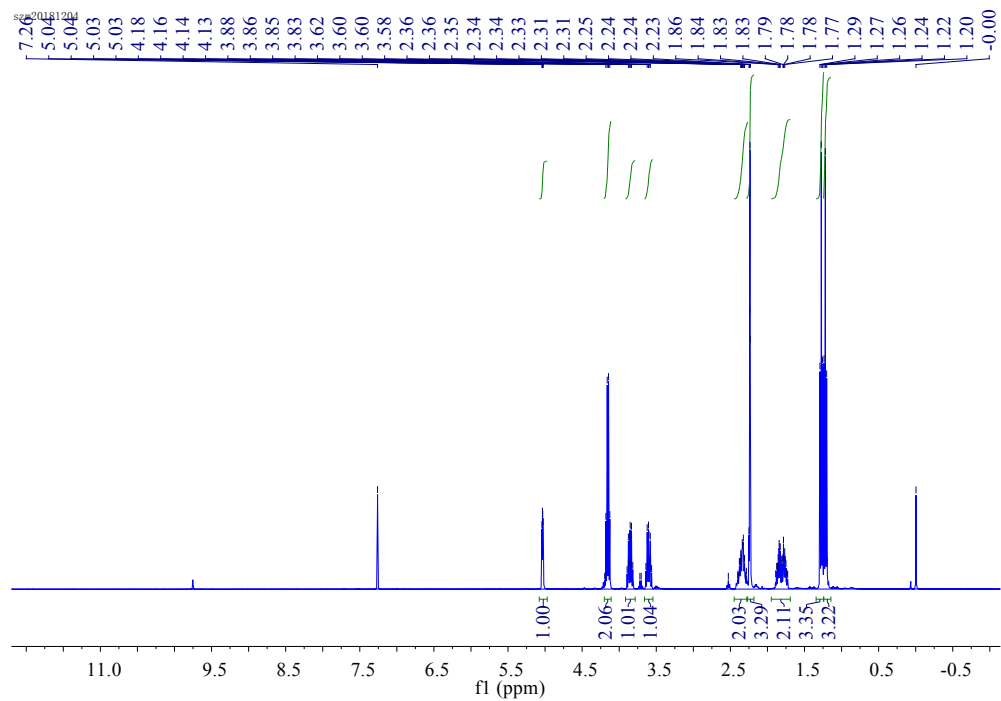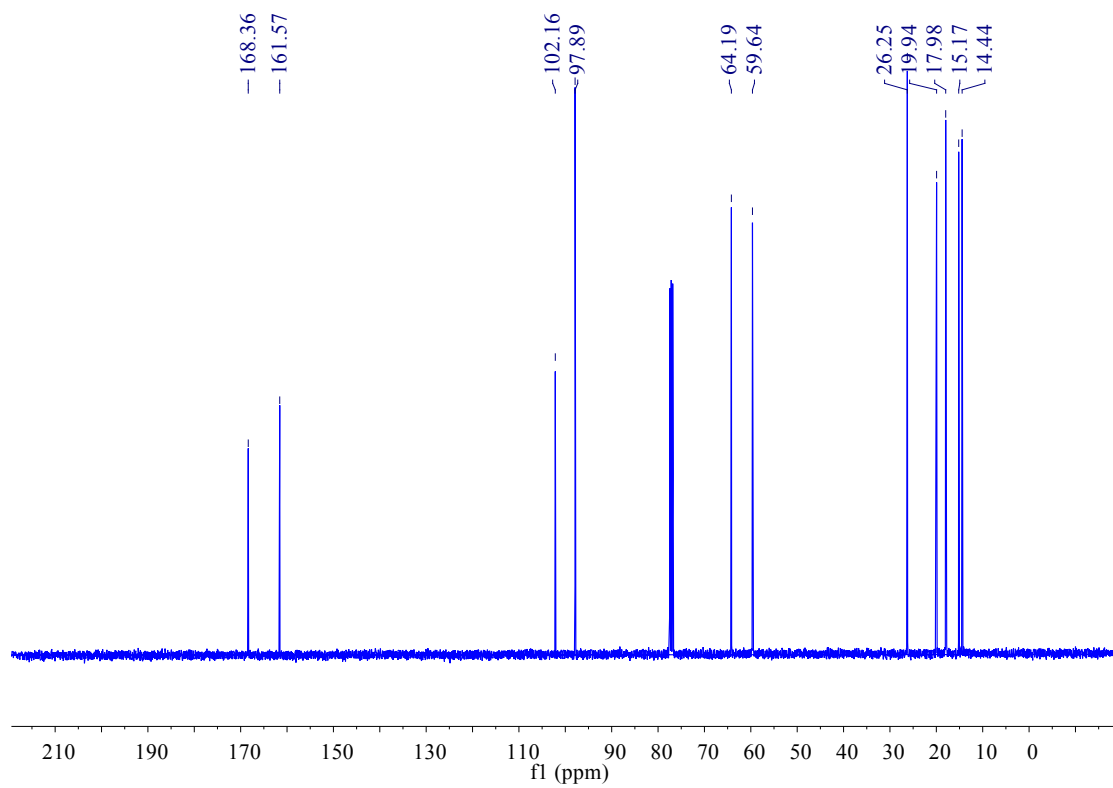



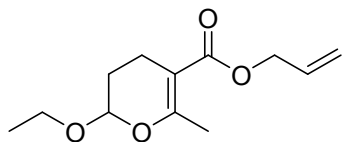

allyl 2-ethoxy-6-methyl-3,4-dihydro-2H-pyran-5-carboxylate

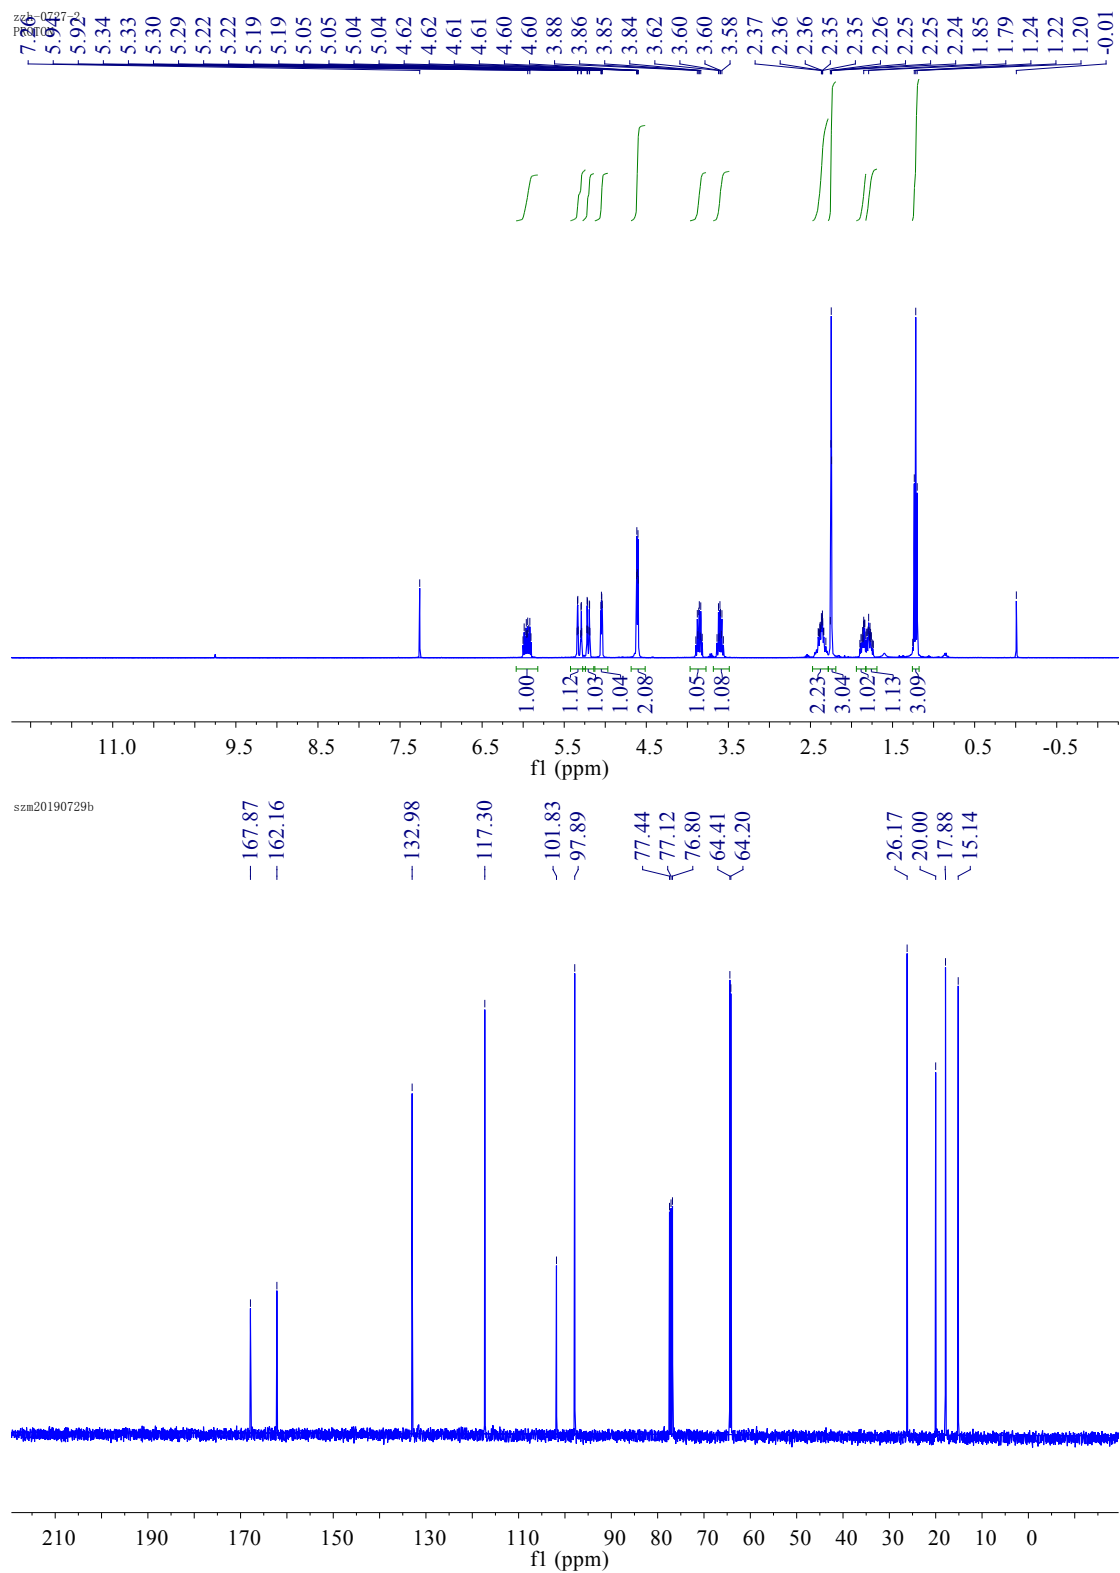

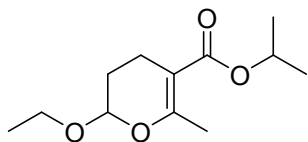

isopropyl 2-ethoxy-6-methyl-3,4-dihydro-2H-pyran-5-carboxylate

zzh-0806-1

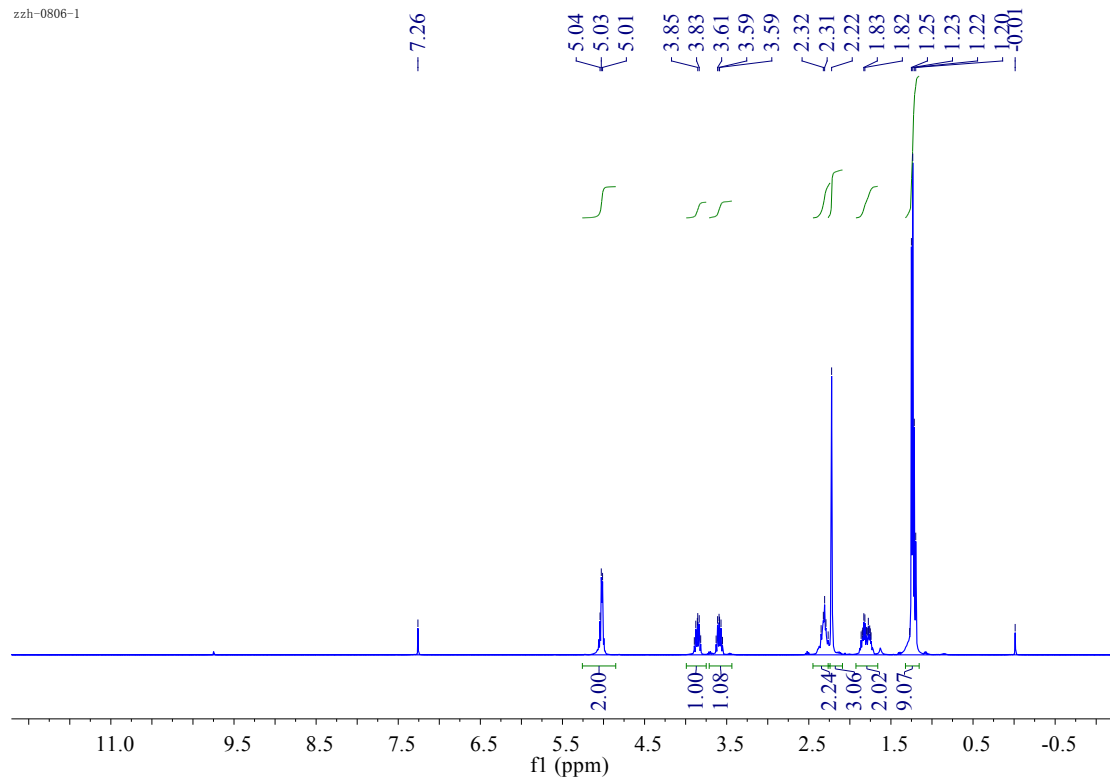

szm20190806iPr

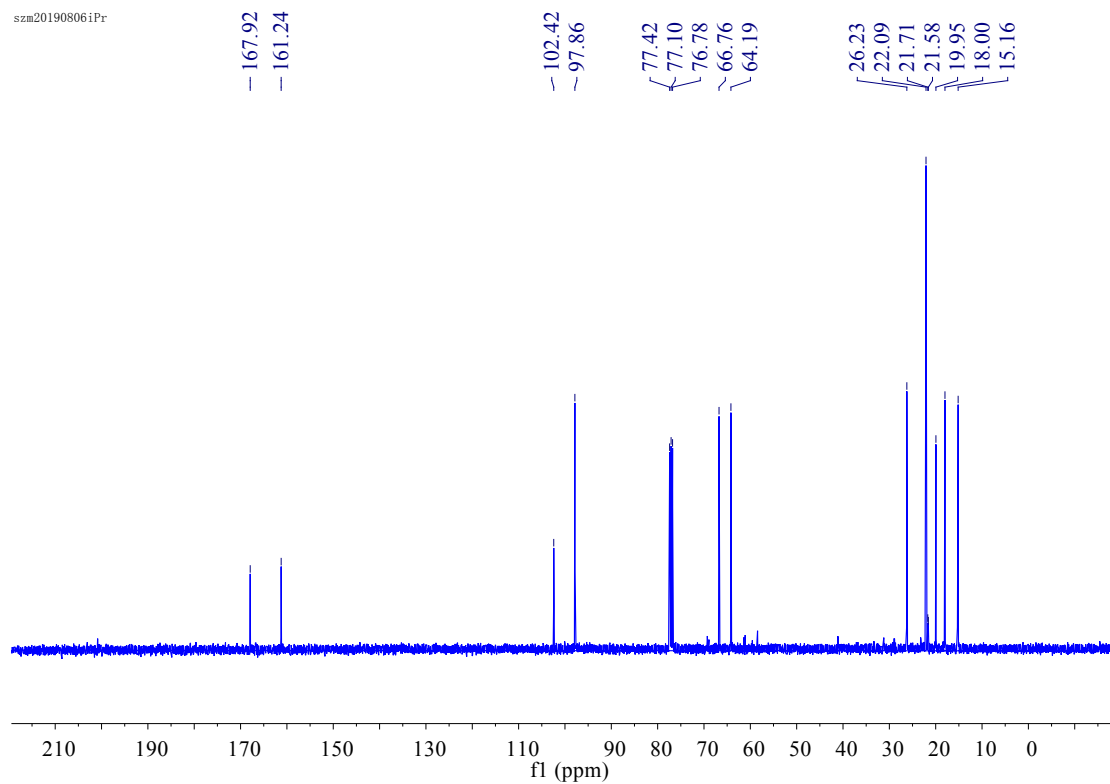

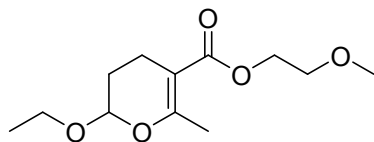

2-methoxyethyl 2-ethoxy-6-methyl-3,4-dihydro-2H-pyran-5-carboxylate

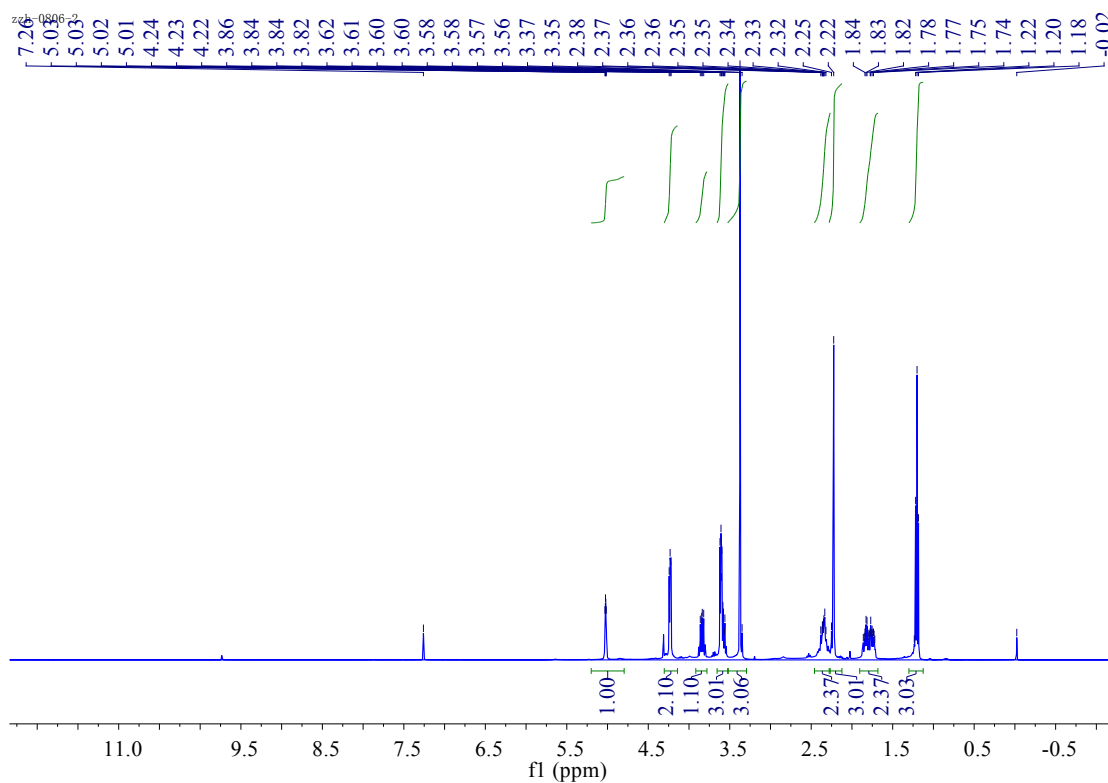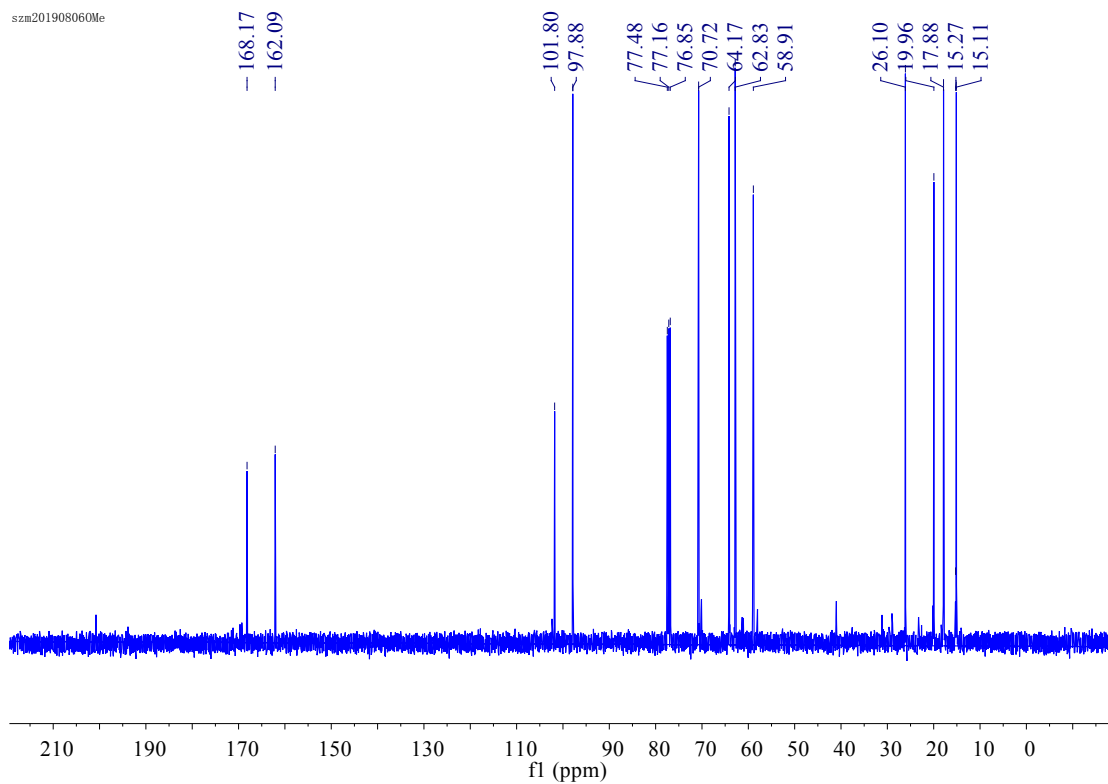

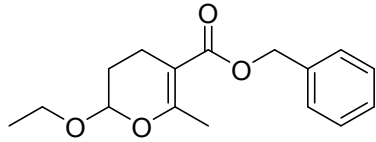

benzyl 2-ethoxy-6-methyl-3,4-dihydro-2H-pyran-5-carboxylate

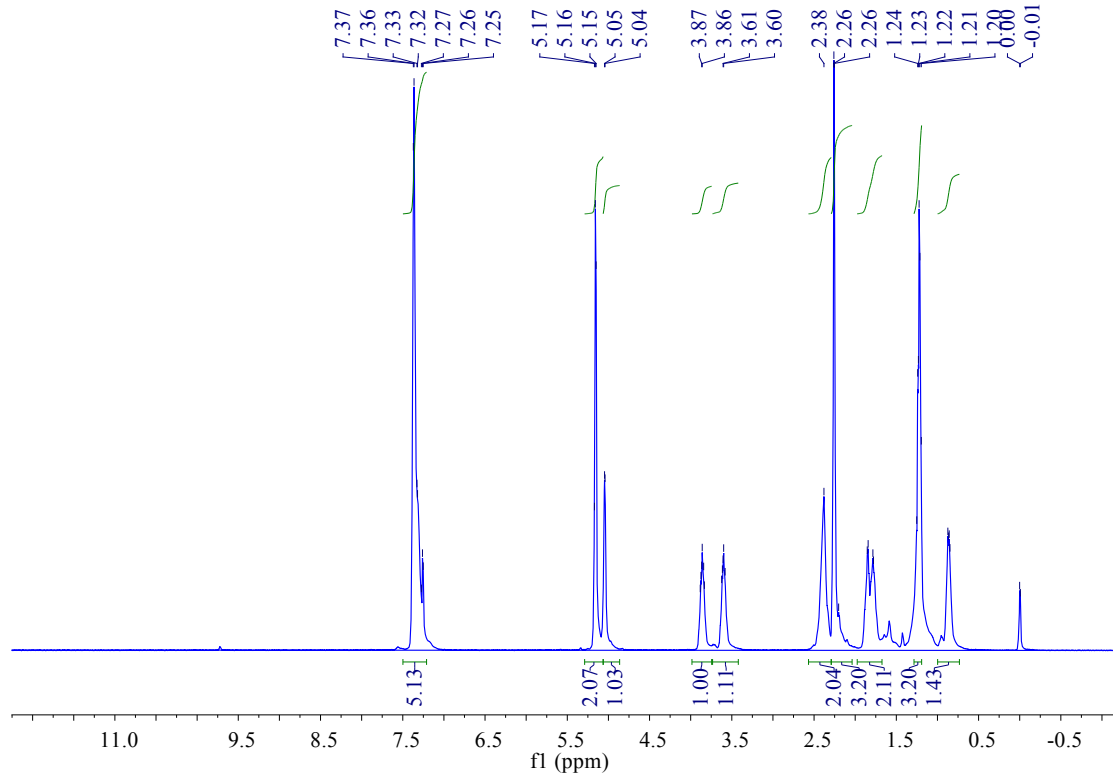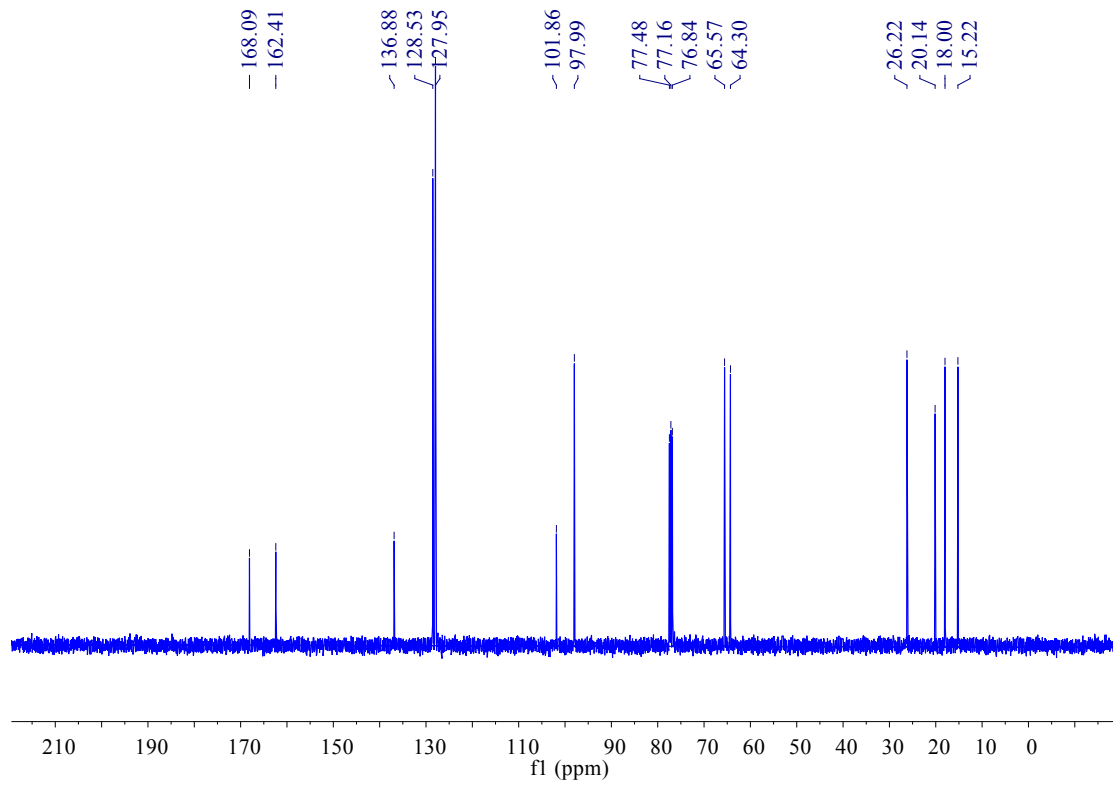

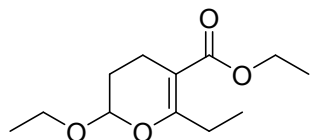

ethyl 2-ethoxy-6-ethyl-3,4-dihydro-2H-pyran-5-carboxylate

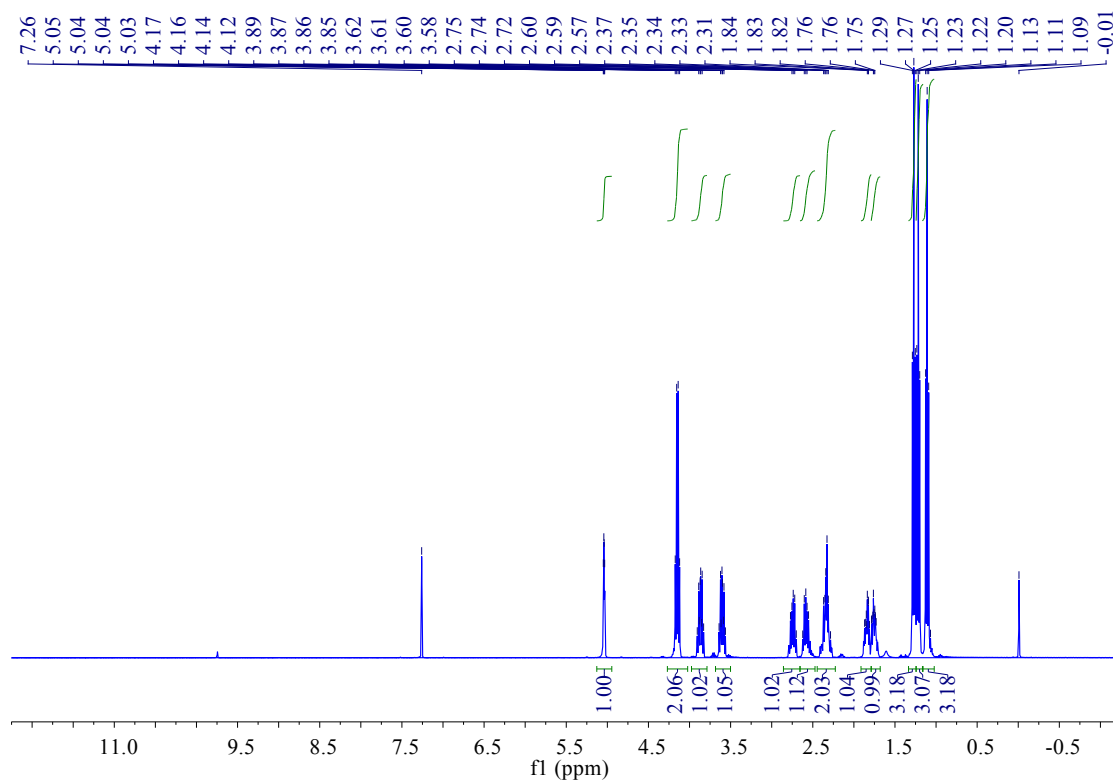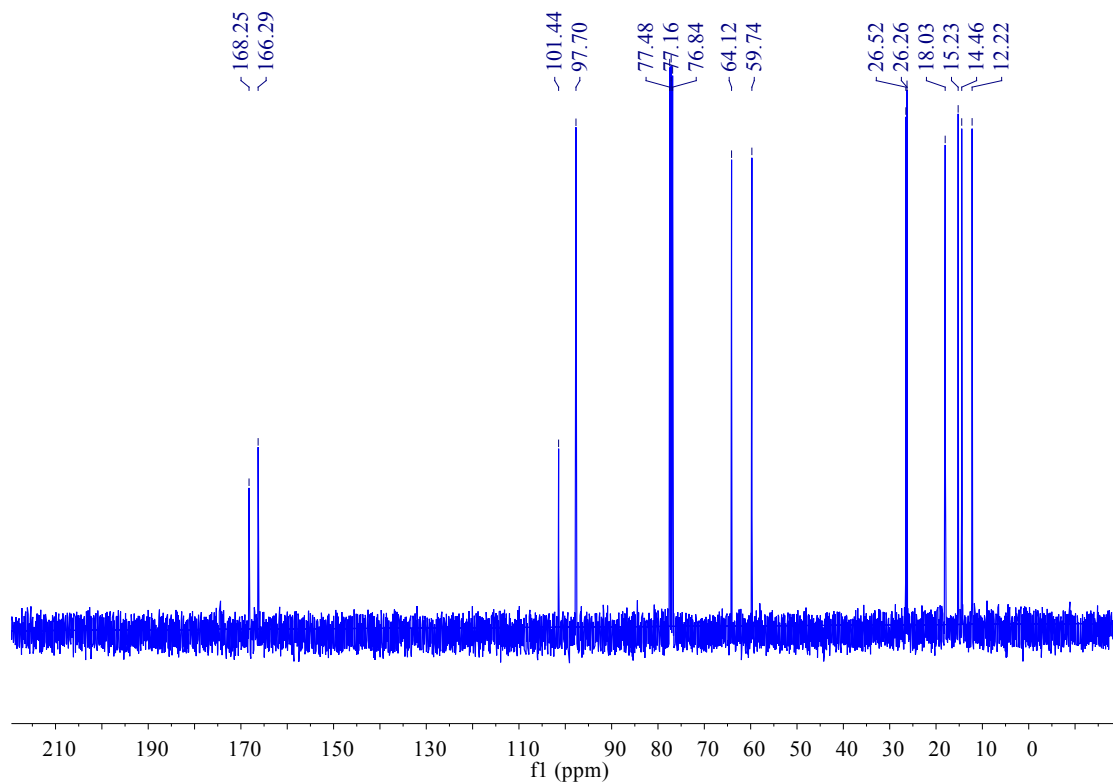

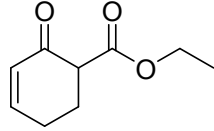

ethyl 2-oxocyclohex-3-ene-1-carboxylate

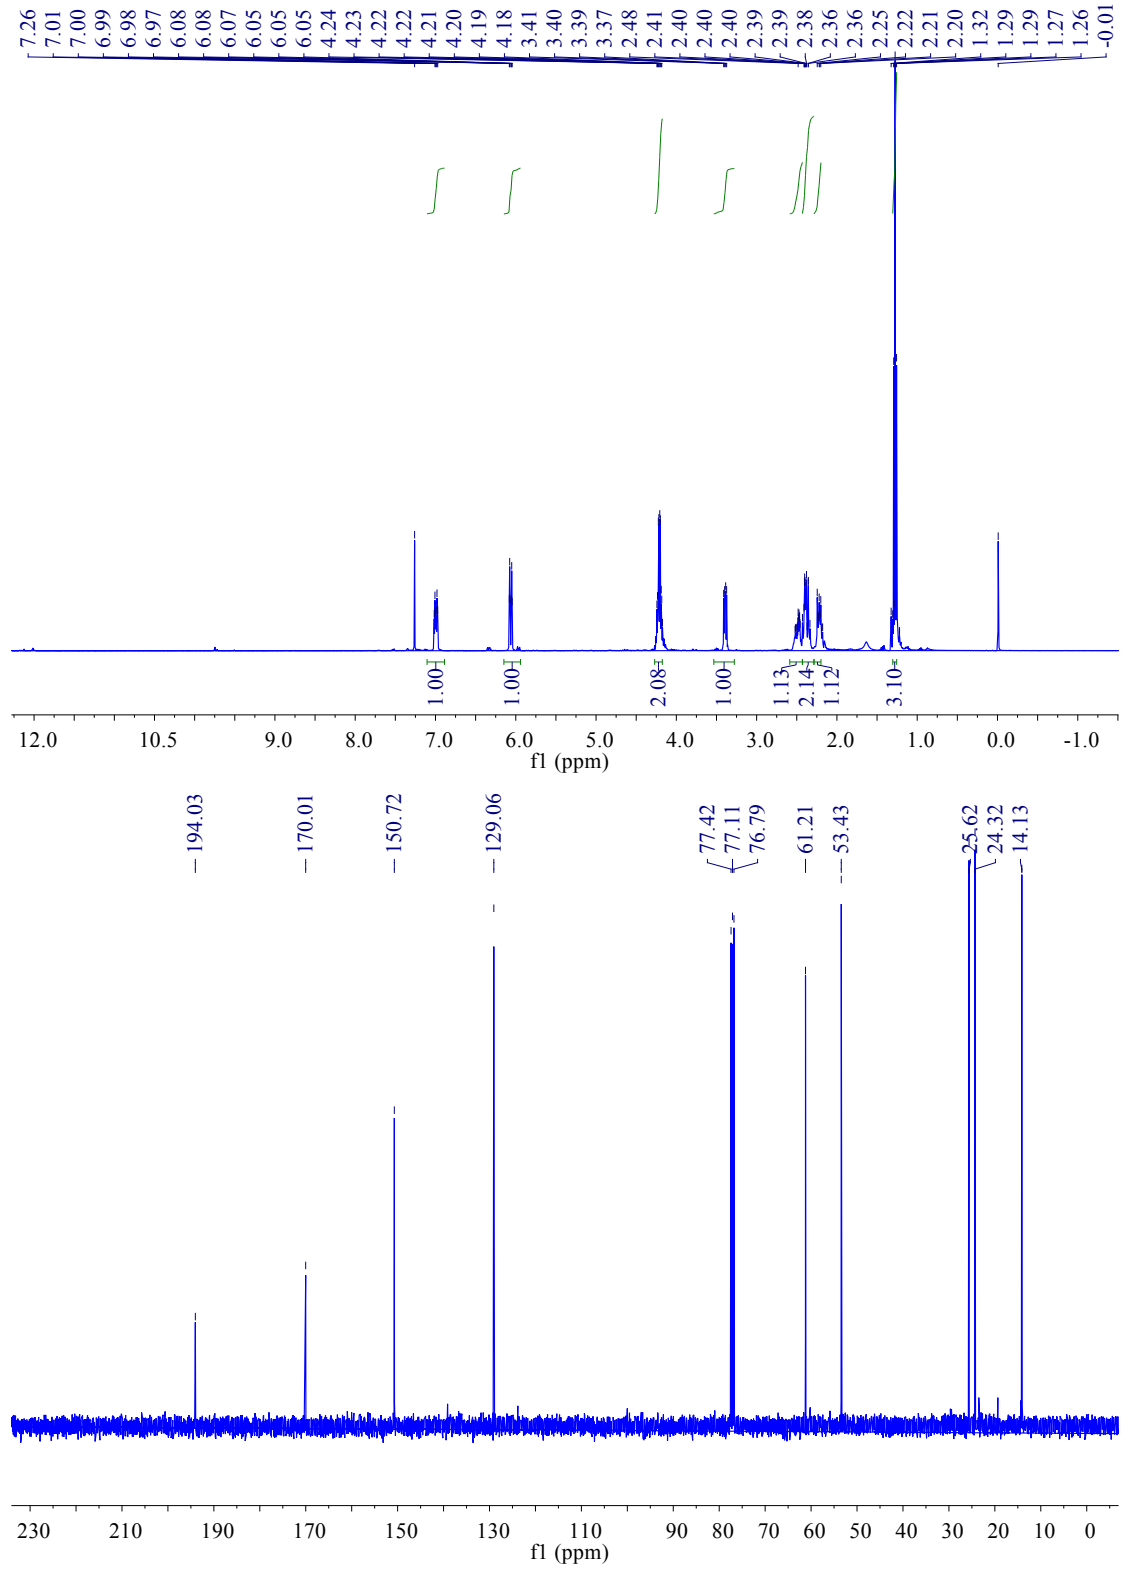

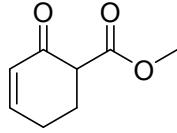

methyl 2-oxocyclohex-3-ene-1-carboxylate

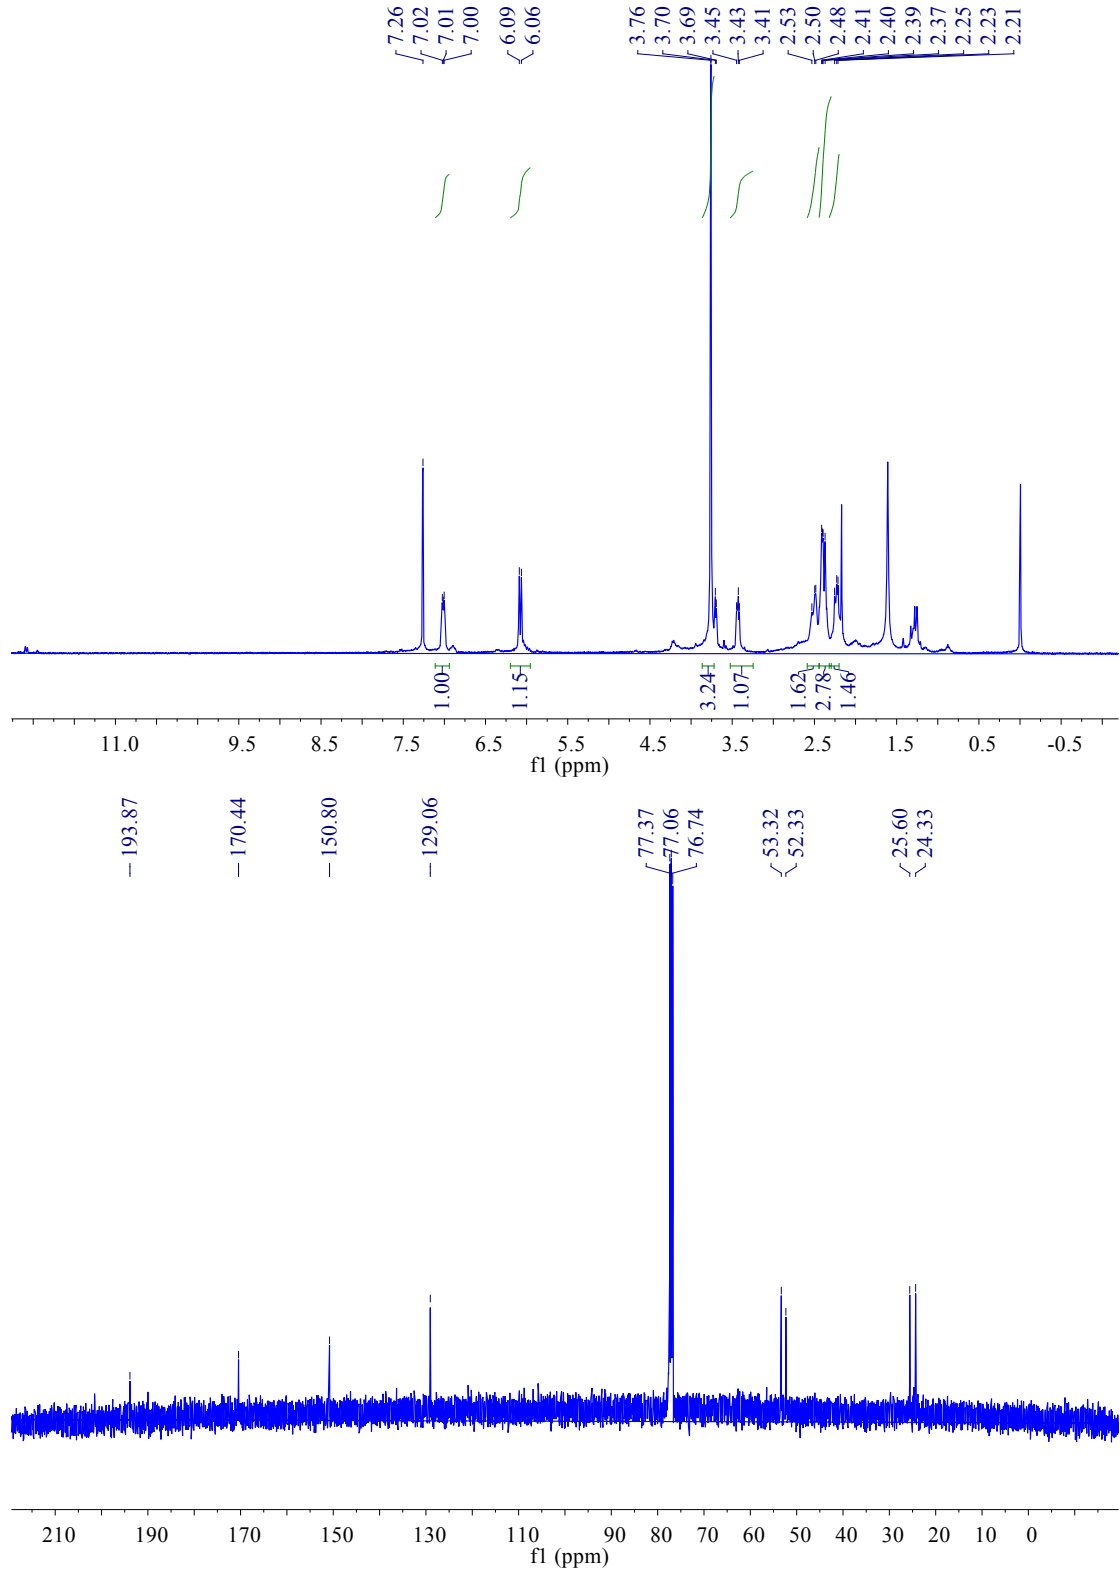

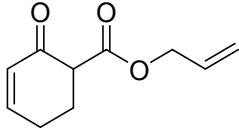

allyl 2-oxocyclohex-3-ene-1-carboxylate

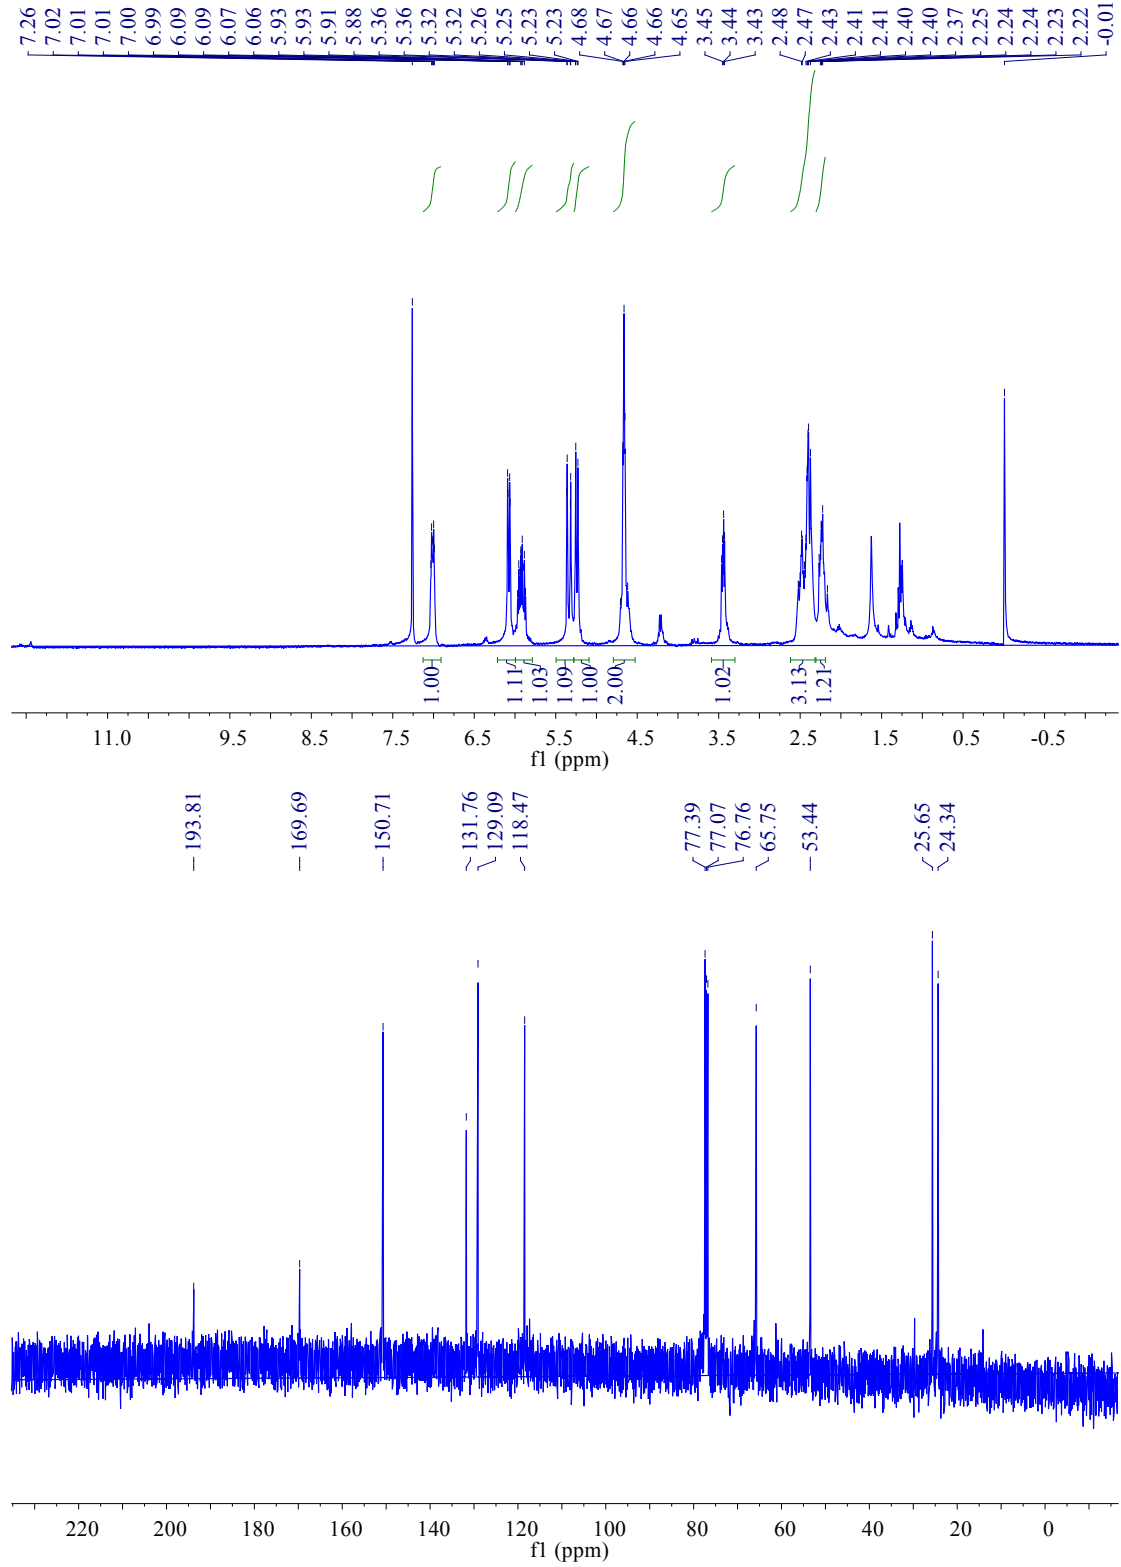



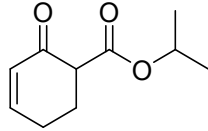

isopropyl 2-oxocyclohex-3-ene-1-carboxylate

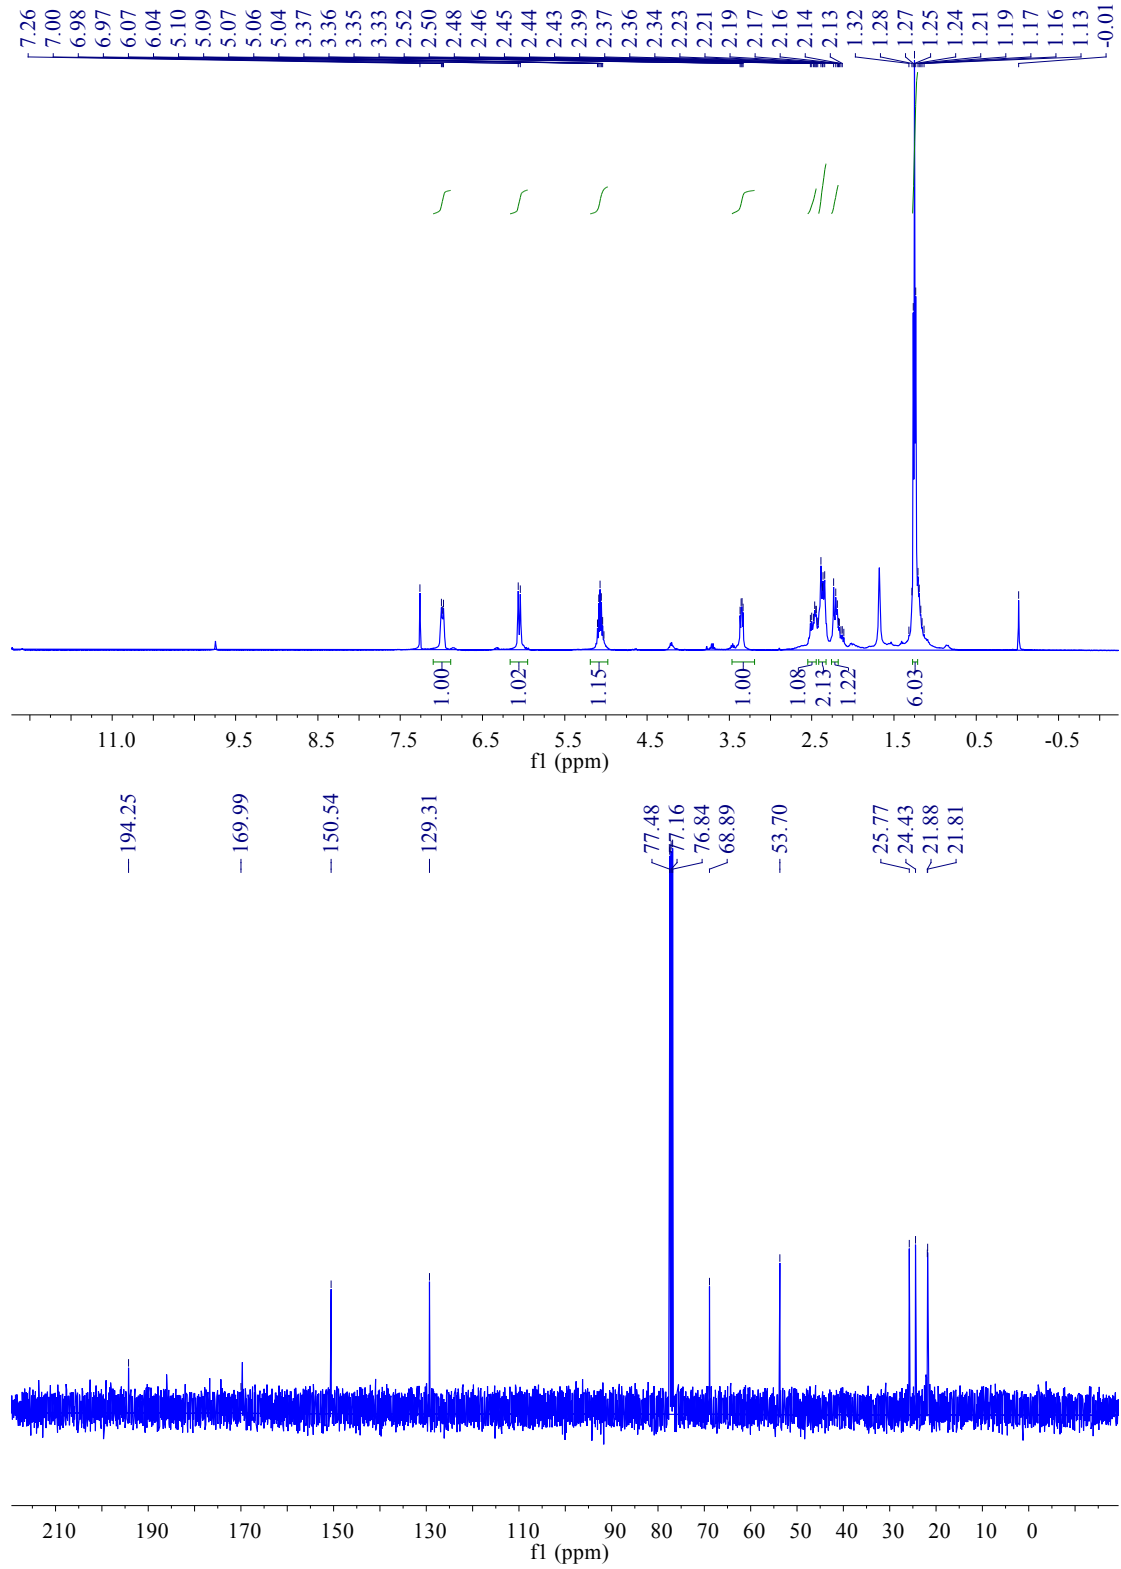

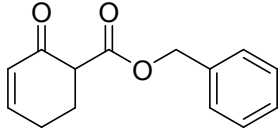

benzyl 2-oxocyclohex-3-ene-1-carboxylate

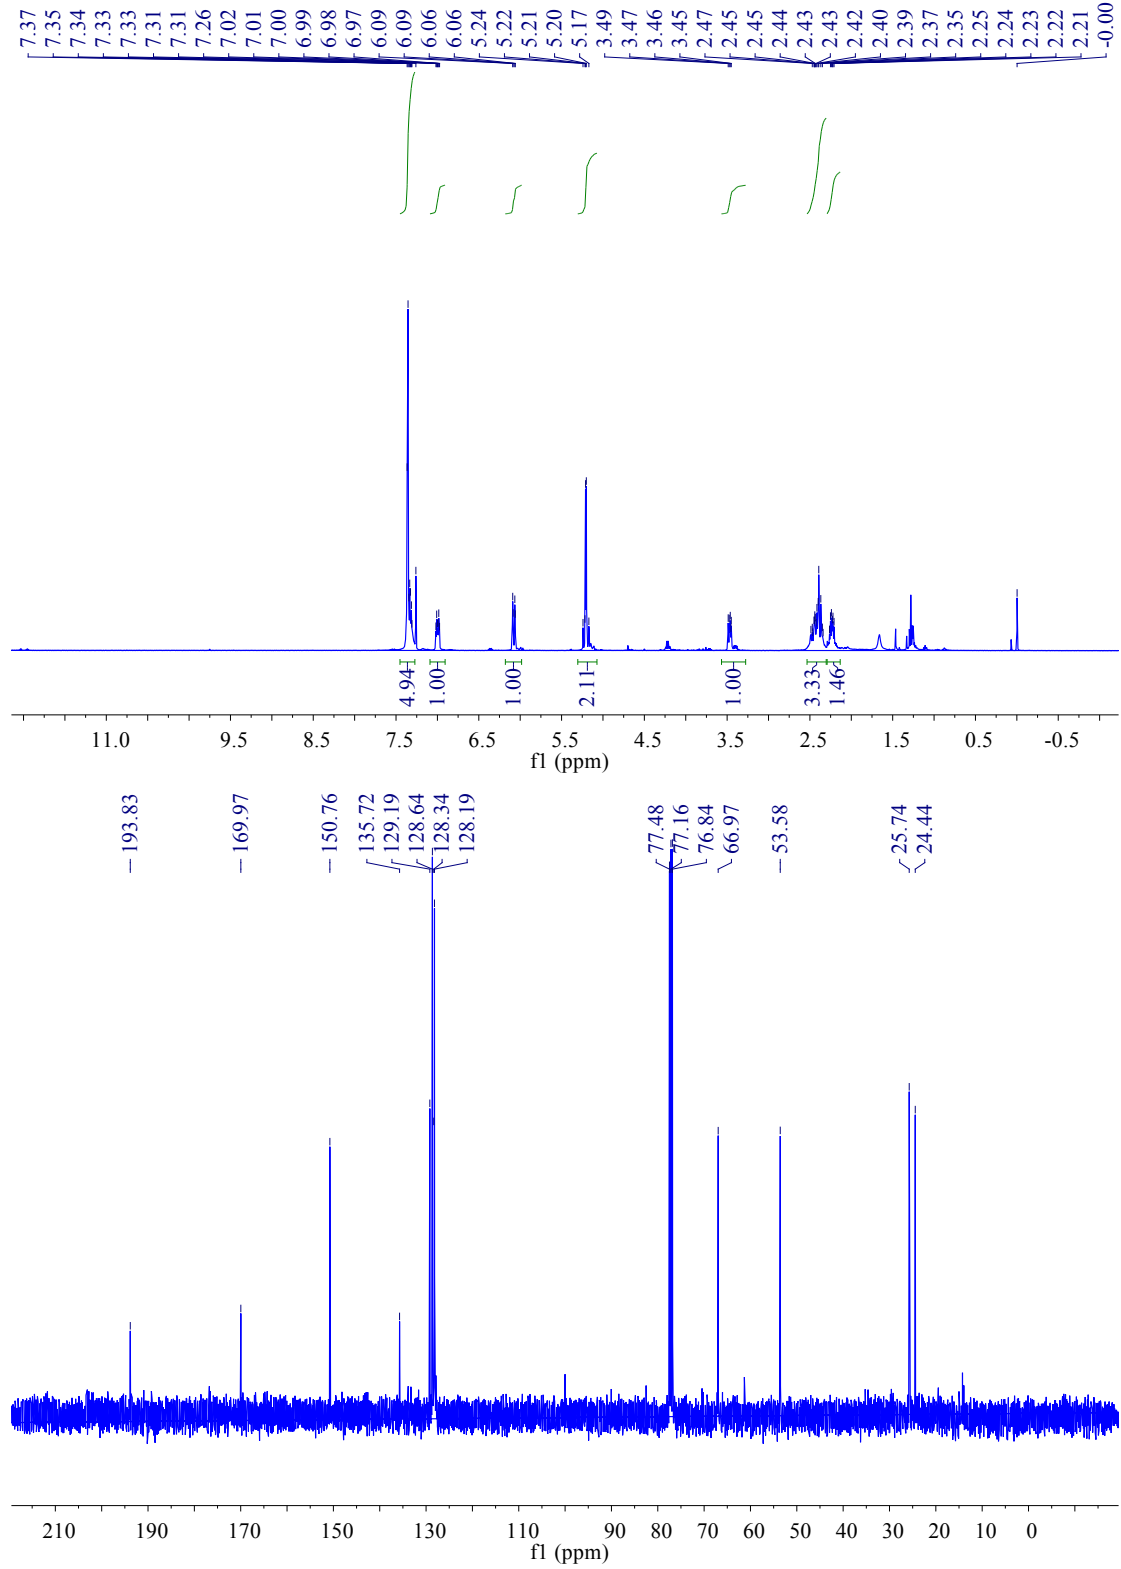

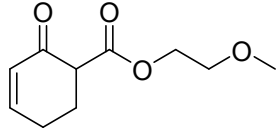

2-methoxyethyl 2-oxocyclohex-3-ene-1-carboxylate

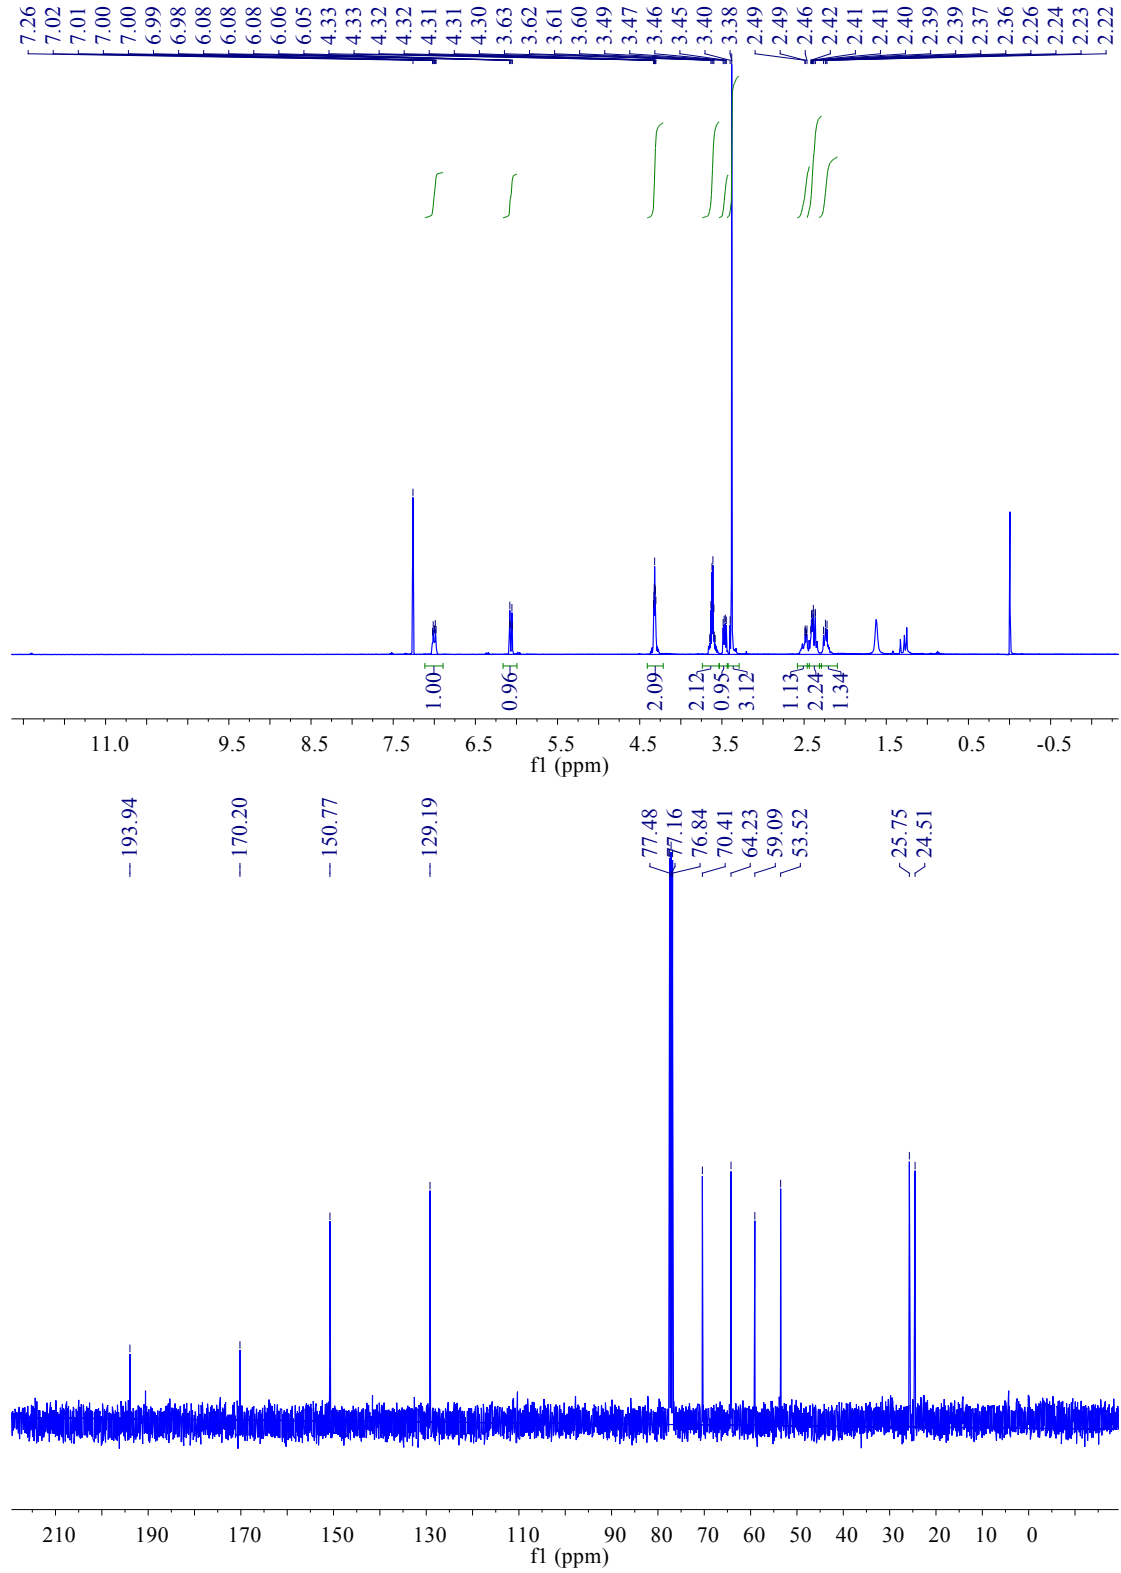

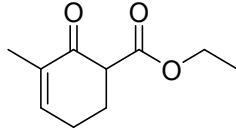

ethyl 3-methyl-2-oxocyclohex-3-ene-1-carboxylate

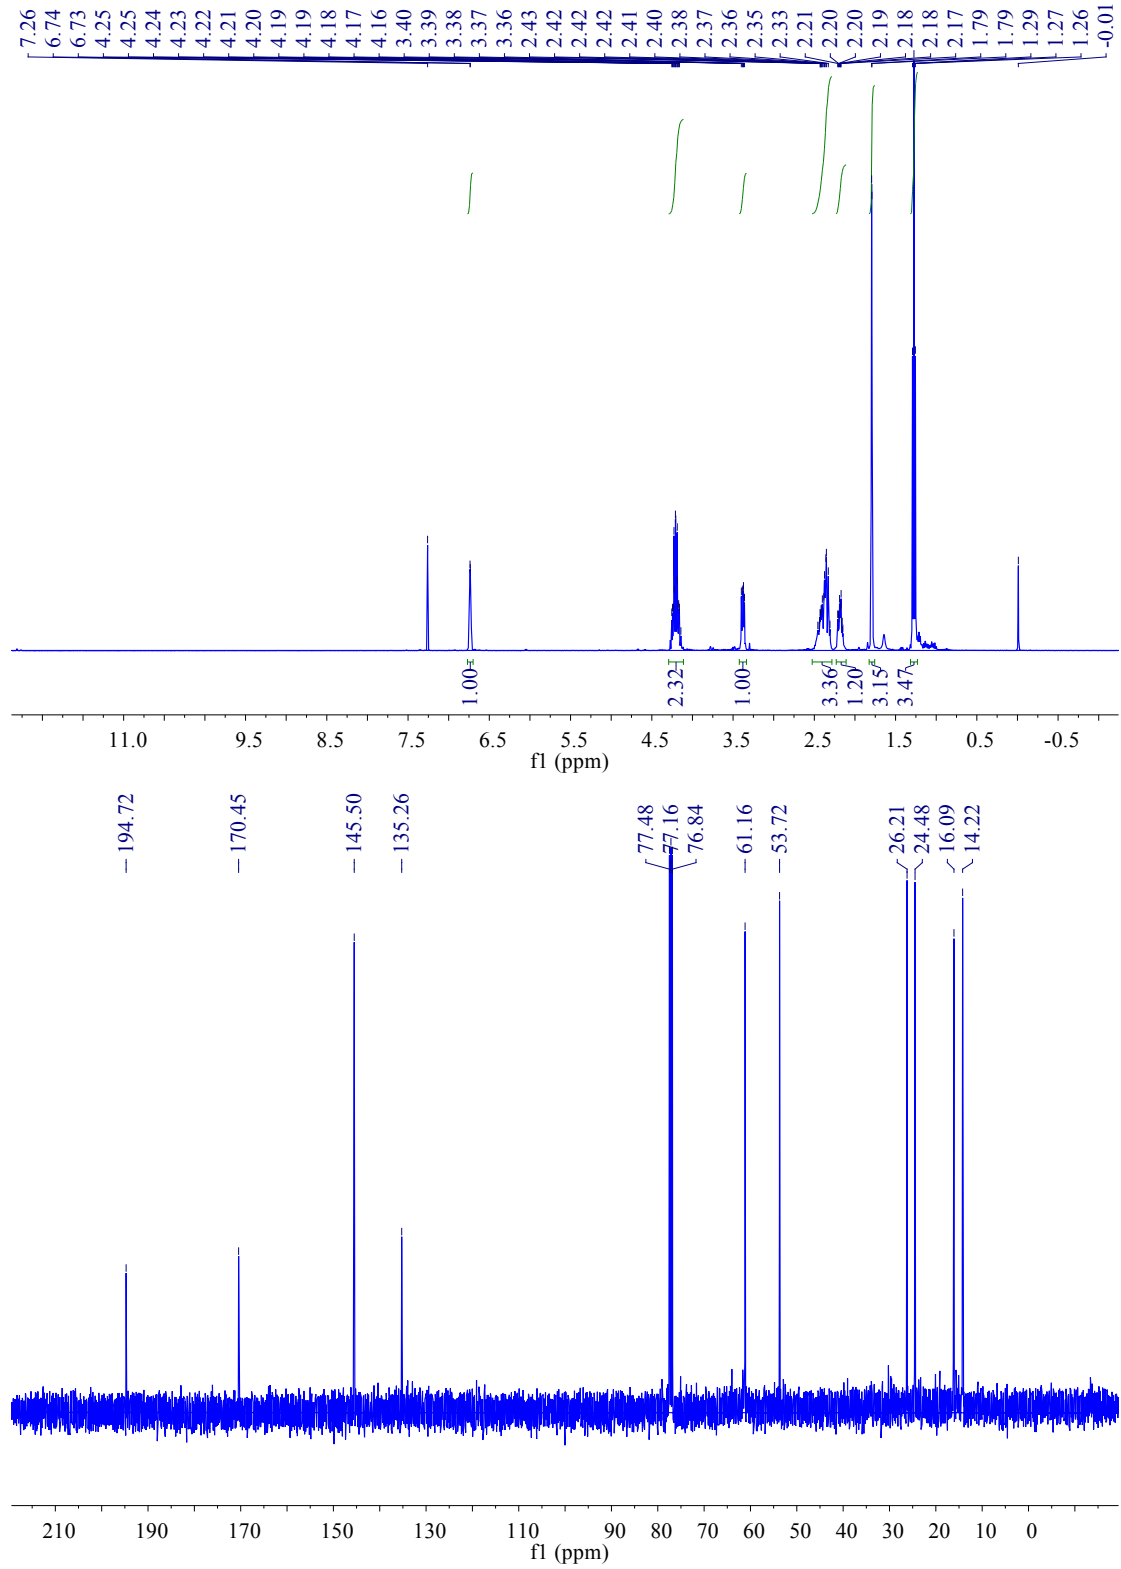

Supplement: d0nj01357a1.pdf [file d0nj01357a1.pdf]
